# Supplementary material for: In Vivo Biocatalytic Cascades Featuring an Artificial‐Enzyme‐Catalysed New‐to‐Nature Reaction
Source: PubMed Central journal article supplement (PMC10100225; doi:10.1002/anie.202214191), 2022-11-30
Supplement: ANIE-62-0-s001.pdf [file ANIE-62-0-s001.pdf]

Supporting Information

**In Vivo Biocatalytic Cascades Featuring an Artificial-Enzyme-Catalysed New-to-Nature Reaction**

*L. Ofori Atta, Z. Zhou, G. Roelfes\**

## Supporting information

I

### Table of Contents

|                                                                                             |    |
|---------------------------------------------------------------------------------------------|----|
| <b>Supplementary tables</b> .....                                                           | 2  |
| <b>Supplementary figure</b> .....                                                           | 2  |
| <b>Methods and Materials</b> .....                                                          | 3  |
| <b>Protein biosynthesis</b> .....                                                           | 4  |
| <b>HPLC Chromatogram for aldehydes</b> .....                                                | 7  |
| <b>Protein Purification</b> .....                                                           | 7  |
| <b>Trypsin digest</b> .....                                                                 | 8  |
| <b>Mass Spectrometry Analysis</b> .....                                                     | 9  |
| <b>Uv-vis spectroscopy</b> .....                                                            | 13 |
| <b>UPLC-MS Analysis</b> .....                                                               | 13 |
| <b>Hydrazone formation reaction <i>in vivo</i> / <i>in vitro</i></b> .....                  | 14 |
| <b>Background reaction of hydrazone formation</b> .....                                     | 17 |
| <b>HPLC Chromatogram for hydrazone</b> .....                                                | 18 |
| <b>Reductive amination using NaCNBH<sub>3</sub></b> .....                                   | 20 |
| <b>Recycling Experiment</b> .....                                                           | 24 |
| <b>Cell viability test after catalysis</b> .....                                            | 25 |
| <b>Plasmid maps of plasmids used in this study</b> .....                                    | 30 |
| <b>Calibration Curves for Aldehydes</b> .....                                               | 31 |
| <b>Chemical synthesis and calibration curves of hydrazone products 3a and 3b</b>            | 31 |
| <b>NMR spectra</b> .....                                                                    | 33 |
| <b>Scale up of <i>in vivo</i> hydrazone reaction using LmrR_V15pAF_RM/HMFO system</b> ..... | 34 |
| <b>References</b> .....                                                                     | 36 |

## Supplementary tables

| <i>E. coli</i> Strains            | Plasmids                                 |
|-----------------------------------|------------------------------------------|
| K-12 MG1655 (RARE) for expression | pETDuet-1 harbouring <i>CAR-SFP</i>      |
| NEB 5 alpha for cloning           | pETDuet-1 harbouring <i>FCS-ECH</i>      |
| NEB 10 beta for cloning           | pET28b+ harbouring LmrR-V15pAF_RMH       |
|                                   | pBAD harbouring HMFO and LmrR-V15pAF_RMH |
|                                   | pDULE 2 harbouring pAF OTS               |

**Table S1.** Bacteria strains and plasmid used in this study.

| Protein Sample  | Expression plasmid/OTS | $k_{cat}/K_m$ (app) $M^{-1}/s^{-1}$ |
|-----------------|------------------------|-------------------------------------|
| LmrR_V15pAF_RMH | pEVOL_pAzF             | 70                                  |
| LmrR_V15pAF_RMH | pDULE 2 pAF            | 54                                  |

**Table S2.** Comparison of catalytic efficiency in the hydrazone formation reaction of **1a** with **2** to form **3**, by artificial enzymes produced using direct incorporation of pAF and indirect incorporation of pAF into LmrR\_V15X RMH using the hydrazone formation reaction.<sup>[1]</sup> Based on the relative activity it is concluded that the pAF incorporation efficiency is ~80% when using the direct incorporation method.  $k_{cat}/K_m$  (app)  $M^{-1}/s^{-1}$  = catalytic efficiency **Extinction Coefficient** ( $\epsilon$ ) = 29,585  $M^{-1} cm^{-1}$ .

## Supplementary figure

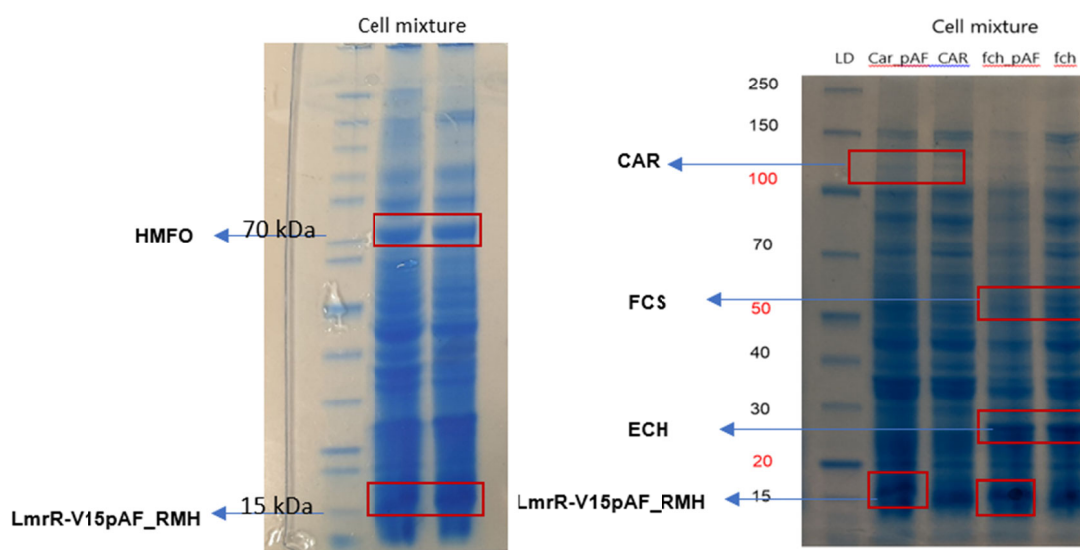

**Figure S1.** Expression of LmrR\_V15pAF\_RMH, CAR, FCS-ECH and HMFO after integration of the plasmids in *E. coli* RARE. CAR showed a low expression, most likely caused by its large gene size of 4000 bp, making it difficult for RNA polymerase to synthesise the protein.

## Methods and Materials

**Strains and Plasmids:** *E. coli* strains and plasmids used in this study are listed in Table S1. Molecular biology techniques were performed using standard practices unless otherwise stated. Molecular cloning and vector propagation were performed in K-12 MG1655. The *CAR* gene from *Nocardia iowensis* and *SFP* gene from *Bacillus subtilis*, were synthesized and codon-optimized for expression in *E. coli* (GenScript USA). The pDULE plasmid harbouring pAF synthase\trNA genes was purchased from Addgene (pDule2-para-aminoPhe was a gift from Ryan Mehl, Addgene plasmid #85503)<sup>[2]</sup>, the pBad plasmid harbouring *HMFO* was a gift from the Fraaije group (University of Groningen). Purified HMFO used in this study was a gift from Gecco Biotech ([www.gecco-biotech.com](http://www.gecco-biotech.com)).

**Cell culture conditions:** A standard recipe for Lysogenic Broth (LB) medium was used (10 g/L Bacto tryptone, 5 g/L Yeast extract, 10 g/L NaCl and 15 g/L Agar for LB-Agar plates). MMV medium was prepared with the following recipe, 5.3 g/L  $\text{Na}_2\text{HPO}_4 \times 12 \text{H}_2\text{O}$ , 1.4 g/L  $\text{KH}_2\text{PO}_4$ , 0.2 g/L  $\text{MgSO}_4 \times 7 \text{H}_2\text{O}$ , 1.0 g/L  $(\text{NH}_4)_2\text{SO}_4$ . The following components were sterile-filtered using 0.2  $\mu\text{m}$  filter before adding the medium: 1 ml/L vitamin solution (1000  $\times$ ), 5 ml/L trace solution (200  $\times$ ), 4 ml/L glucose (50%). M9 medium was prepared using the following recipe, 56 g/L of M9 salt (mix by Sigma) and a 0.2  $\mu\text{m}$  filter was used to filter the following component before addition 100  $\mu\text{l}$  of 1 M  $\text{CaCl}_2$ , 2 mL of 1 M  $\text{MgSO}_4$ , 8 mL of 50% glucose solution, 5 mL of 4% vitamin B1 (thiamine), 50 mL of 20% Cas-amino acids.

### Minimal media with vitamins

The minimal media with vitamins used in this work was prepared as follows. The content per litre had 5.3 g  $\text{Na}_2\text{HPO}_4 \cdot 12\text{H}_2\text{O}$ , 1.4 g  $\text{KH}_2\text{PO}_4$ , 0.2 g  $\text{MgSO}_4 \cdot 7\text{H}_2\text{O}$ , 1.0 g  $(\text{NH}_4)_2\text{SO}_4$ , 1 ml vitamin solution and 5 ml of a trace element solution, 4 ml glucose (50%) and Antibiotics . The trace element solution per litre contained 780 mg  $\text{Ca}(\text{NO}_3)_2 \cdot 4\text{H}_2\text{O}$ , 200 mg  $\text{FeSO}_4 \cdot 7\text{H}_2\text{O}$ , 10 mg  $\text{ZnSO}_4 \cdot 7\text{H}_2\text{O}$ , 10 mg  $\text{H}_3\text{BO}_3$ , 10 mg of  $\text{CoCl}_2 \cdot 6\text{H}_2\text{O}$ , 10 mg  $\text{CuSO}_4 \cdot 5\text{H}_2\text{O}$ , 4 mg  $\text{MnSO}_4 \cdot \text{H}_2\text{O}$ , 3 mg  $\text{Na}_2\text{MoO}_4 \cdot 2\text{H}_2\text{O}$ , 2 mg  $\text{NiCl}_2 \cdot 6\text{H}_2\text{O}$ , and 2 mg  $\text{Na}_2\text{WO}_4 \cdot 2\text{H}_2\text{O}$  <sup>[3]</sup>. The vitamin solution consisted of 2.2 mg Biotin, 2.2 mg folic acid, 220 mg p-aminobenzoic acid, 220 mg Riboflavin, 440 mg pantothenic acid, 440 mg niacinamide, 440 mg pyridoxine $\times$ HCl, 440 mg, thiamine $\times$ HCl per litre <sup>[4]</sup>.

## Protein biosynthesis

For experiments testing the direct incorporation of pAF into LmrRV15TAG, pDULE vector harboring pAF synthase\tRNA and pET17b+ vector harboring LmrRV15TAG were co-transformed into *E. coli* k-12 MG1655 (RARE). Culture media were supplemented with 100 µg/L ampicillin and 10 µg/L streptomycin to provide selective pressure for plasmid maintenance. Except for cultures grown in LB medium, overnight pre-cultures were pelleted and re-suspended in either M9 medium or MMV medium. This step was done to ensure that nutrient rich LB medium was removed. Experimental cultures were then initiated by adding 2 % (v/v) of re-suspended pre-cultures into 50 ml either M9 or MMV medium while 1 % (v/v) pre-culture was added to LB medium. Gene expression was then induced with 1 M isopropyl-β-d-1-thiogalactopyranoside (IPTG) (1 mM final concentration) and 20 % L- arabinose (0.02 % final concentration) between an OD<sub>600</sub> of 0.4 and 1. During induction, 1 M pAF (1 mM final concentration) was added in solid form, incubated at 24 °C, and agitated at 135 rpm for 48 hrs. These experiments were performed in 250 ml baffled Erlenmeyer flasks for better aeration.

| Media/Sample | Strain<br><i>E.Coli</i> K-12 MG1655 | pAF          | Temperature | Time     |
|--------------|-------------------------------------|--------------|-------------|----------|
| LB           | RARE                                | 1mM          | 30 °C       | 16 h     |
| LB control   | RARE                                | No pAF added | 30 °C       | 16 h     |
| M9           | RARE                                | 1 mM         | 30 °C       | 16 h     |
| M9 control   | RARE                                | No pAF added | 30 °C       | 16 h     |
| MMV          | RARE                                | 1 mM         | 24 °C       | 48 hours |
| MMV control  | RARE                                | No pAF added | 24 °C       | 48 hours |

**Table S3.** Expression conditions for pAF incorporation into LmrR\_V15X\_RMH.

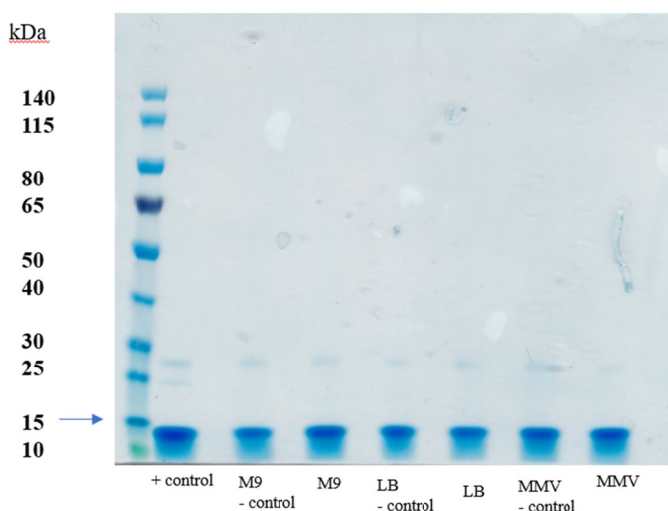

**Figure S2.** SDS-PAGE analysis of pAF incorporation into LmrR-V15X\_RMH. Controls without pAF added do yield protein, which is caused by misincorporation of canonical amino acids due to the promiscuity of the orthogonal translation system.

### Metabolites analysis:

For aromatic aldehydes synthesis, experiments were performed in 250/500 ml Erlenmeyer flasks (Sigma), using 50 mL MMV, supplemented with 100 µg ampicillin. Experimental cultures were initiated by adding 1 % (v/v) inoculum volumes of overnight pre-culture to 50 ml volume of MMV, incubated at 37 °C, and agitated at 135 rpm.

Expression was induced with 1 mM isopropyl-β-d-1-thiogalactopyranoside (IPTG) or 0.02 % arabinose between optical density 600 (OD<sub>600</sub>) of 0.8–1.0. The cultures were incubated at 24 °C and 135 rpm for 16 h. Cultures were spun down at 4000 rpm for 10 mins, pellets were resuspended with fresh MMV and 5 mM of substrate was added at 24 °C and 135 rpm for 16 h. For benzaldehyde producing cultures, samples were spun down and filtered with a 0.2 µm filter before HPLC analysis. In cultures producing para hydroxy benzaldehyde, the products were extracted with ethyl acetate.

HPLC analysis using an Agilent series instrument equipped with a diode array detector was used to detect products at wavelengths of 247 nm and 281 nm for benzaldehyde and para-hydroxy benzaldehyde, respectively. A kinetex-C18 column was used and the gradient method used the following solvents:

(A1) acetonitrile + 0.1% trifluoroacetic acid (TFA); (B1) water +0.1% TFA. The gradient started with 5% Solvent A1 and 95% Solvent B1 with a flow rate of 1.0

mL/min, and all compounds of interest eluted within 30 mins. The column temperature was maintained at 25°C.

| Gene    | Strain <i>E.Coli</i> K-12 MG1655 | Substrate (5 mM )        | Temperature | Time (hours) |
|---------|----------------------------------|--------------------------|-------------|--------------|
| CAR_SFP | RARE                             | Benzoic Acid             | 24°C        | 16 h / 48 h  |
| CAR_SFP | RARE                             | 4 hydroxy-benzoic Acid   | 24 °C       | 16 h / 48 h  |
| FCS-ECH | RARE                             | 4-coumaric acid          | 24 °C       | 16 h / 48 h  |
| HMFO    | RARE                             | benzyl alcohol           | 24 °C       | 16 h / 48 h  |
| HMFO    | RARE                             | 4 hydroxy-benzyl alcohol | 24 °C       | 16 h / 48 h  |

**Table S4.** Expression conditions for *in vivo* aldehydes production using *E.coli* K12 MG1655 (RARE).

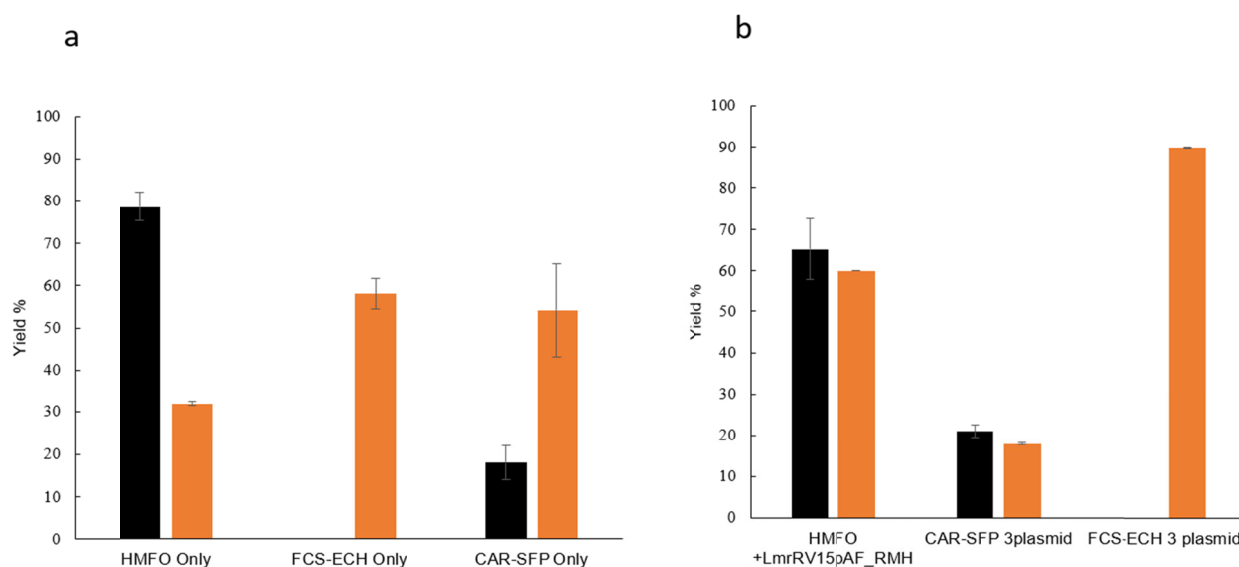

**Figure S3.** *In vivo* production of aldehydes before and after the integration of natural enzymes with LmrR-V15pAF\_RMH in *E.coli* K12 MG1655 (RARE). **(a)** Benzaldehyde (black) was produced by HMFO and CAR-SFP and para hydroxy benzaldehyde (orange) was produced by HMFO, CAR-SFP and FCS- ECH. Expression was done at 24°C/135 rpm for 24 h. **(b)** Aldehydes production using 3 plasmid system (CAR-SFP, FCS=ECH) and 2 plasmid system (HMFO), after the integration of natural enzymes with artificial enzyme (LmrR-V15pAF\_RMH). Expression was done at 24°C/135 rpm for 48 h.

## HPLC Chromatogram for aldehydes

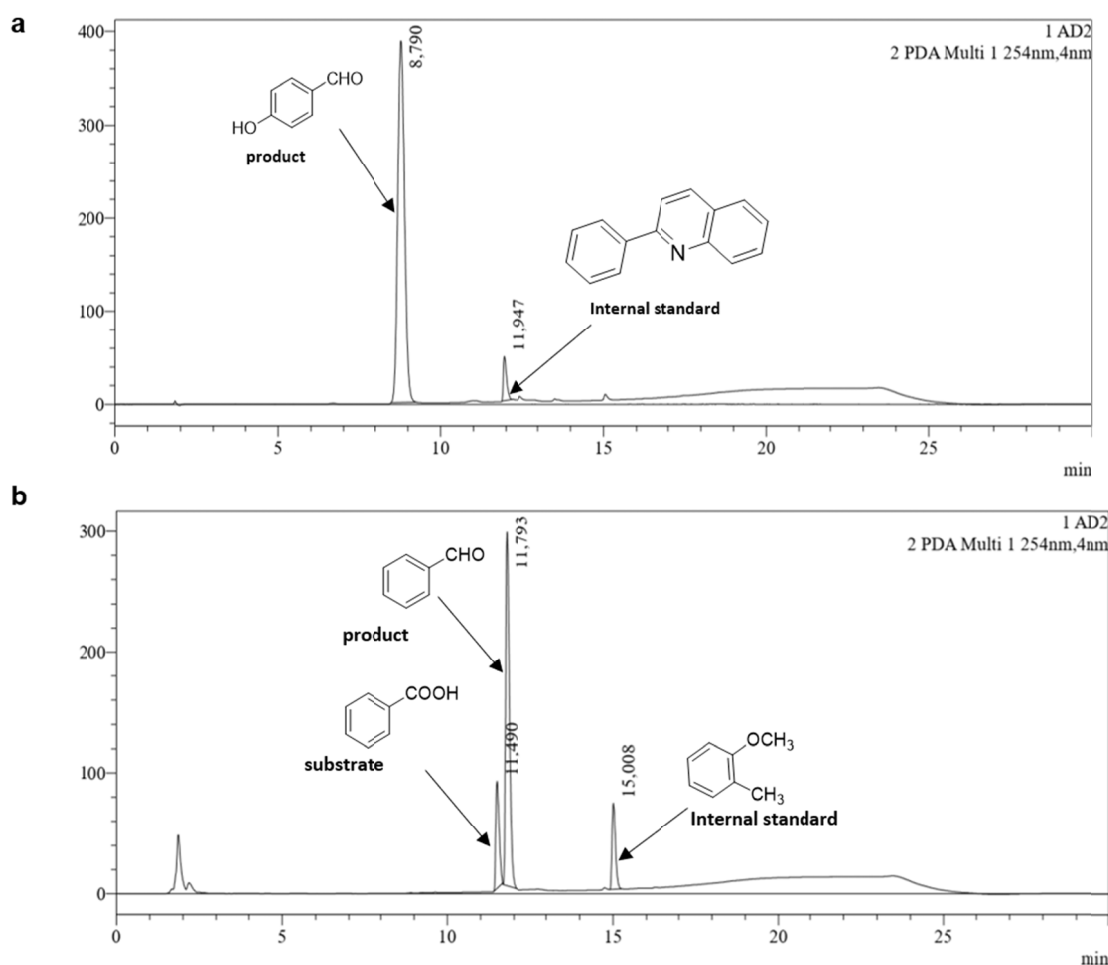

**Figure S4.** HPLC chromatogram of aldehydes biosynthesised in *E. coli* K12 MG1655 (RARE). (a) p-OH benzaldehyde product **3a** peak detected at 8,7 min while the internal standard 2-Phenylquinoline had a retention time around 11,9 min. (b) Benzaldehyde product **3b** peak detected at 11,7 min while the benzoic acid substrate peak had a retention time of 11,4 mins. Here 2-methylanisole was used as an internal standard.

### Protein Purification:

Sodium phosphate buffer (in milliQ water) was prepared with the following recipe: 50 mM of  $\text{Na}_2\text{HPO}_4$ ; 12  $\text{H}_2\text{O}$ , 150 mM of NaCl at pH 8. The buffer was filtered with 0.2  $\mu\text{m}$  sterile filters. After 48 hours of expression at 24 °C, cells were harvested by centrifugation (6,000 rpm., JA10, Beckman) for 20 min, at 4 °C. The cell pellet was resuspended in 20 ml Sodium phosphate buffer and half a tablet “mini complete protease inhibitor cocktail” (Roche) was added. The solutions were sonicated on ice (8 min, pulse of 10 s ON and 15 s OFF, amplitude of 70 %).

The lysed cells were incubated on ice with 0.1 mg /ml of DNase I and 10 mM of  $\text{MgCl}_2$  for 30 min. The mixture was spun down with rotor JA17(Beckman), 12,000 rpm, for 60 min, 4 °C. The supernatant was filtered using a 0.45  $\mu\text{m}$  filter and was



loaded on a Strep-Tactin column (Strep-Tactin Superflow high capacity), incubated for 60 min at 4 °C, and the protein was purified according to the manufacturer's guidelines. Eluents were collected and dialysed against the reaction buffer (50 mM NaH<sub>2</sub>PO<sub>4</sub>, 150 mM NaCl, pH 7.4, two times against 1 L). The concentration of the protein was determined by using the calculated extinction coefficient for LmrR, corrected for the absorbance of pAF ( $\epsilon_{280} = 1,333 \text{ M}^{-1} \text{ cm}^{-1}$ ).

### Trypsin digest

Protein for trypsin digest was initially purified by Streptag affinity chromatography and desalted with dialysis. 4  $\mu\text{l}$  of the LmrRv15pAF\_RMH protein solution was diluted to 20  $\mu\text{l}$  using a 100 mM ammonium bicarbonate (ABC) solution. 20  $\mu\text{l}$  of a 10 ng/ $\mu\text{l}$  trypsin solution in 100 mM ABC was added and incubated overnight at 37 °C. The digestion mixture was acidified by adding 4  $\mu\text{l}$  formic acid and desalted using a C18 stage tip. The eluted peptides were dried in a speedvac and dissolved in 20  $\mu\text{l}$  0.1% formic acid and injected into the nanoLC system for LCMSMS analysis. Resulting data were analysed using PeaksX software (BioSolutions Inc., Waterloo Ontario, Canada).

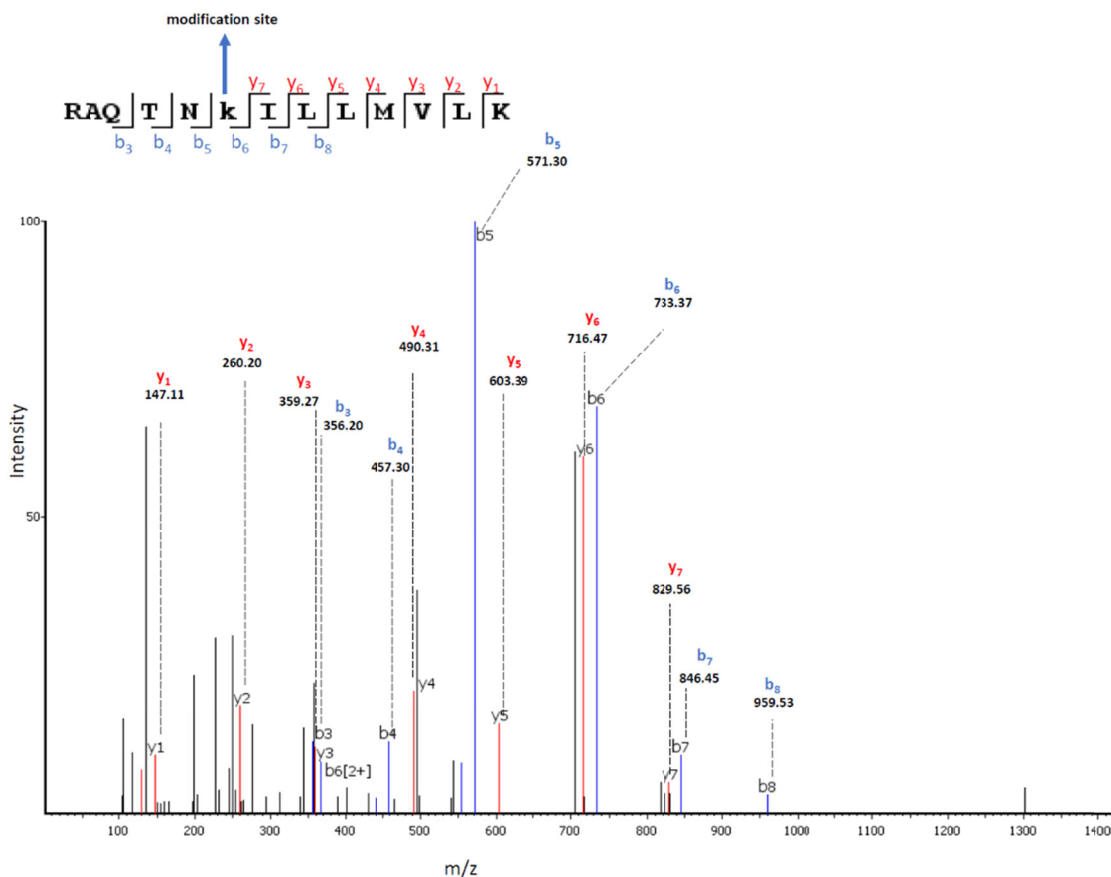

**Figure S5.** MS/MS results for the trypsin digest of LmrR-V15pAF\_RMH expressed in MMV.

## Mass Spectrometry Analysis

The mass spectrometry results showed protein expressed in M9 media had phenylalanine misincorporated and protein expressed in LB had a mixture of pAF and phenylalanine incorporated. Protein produced using the MMV media had pAF incorporated with high selectivity. **Expected Mass = 15126 ; Observed Mass = 15126.64000**

### Mass spectrometry result sample from MMV media of pAF incorporation into LmrR\_V15X\_RMH

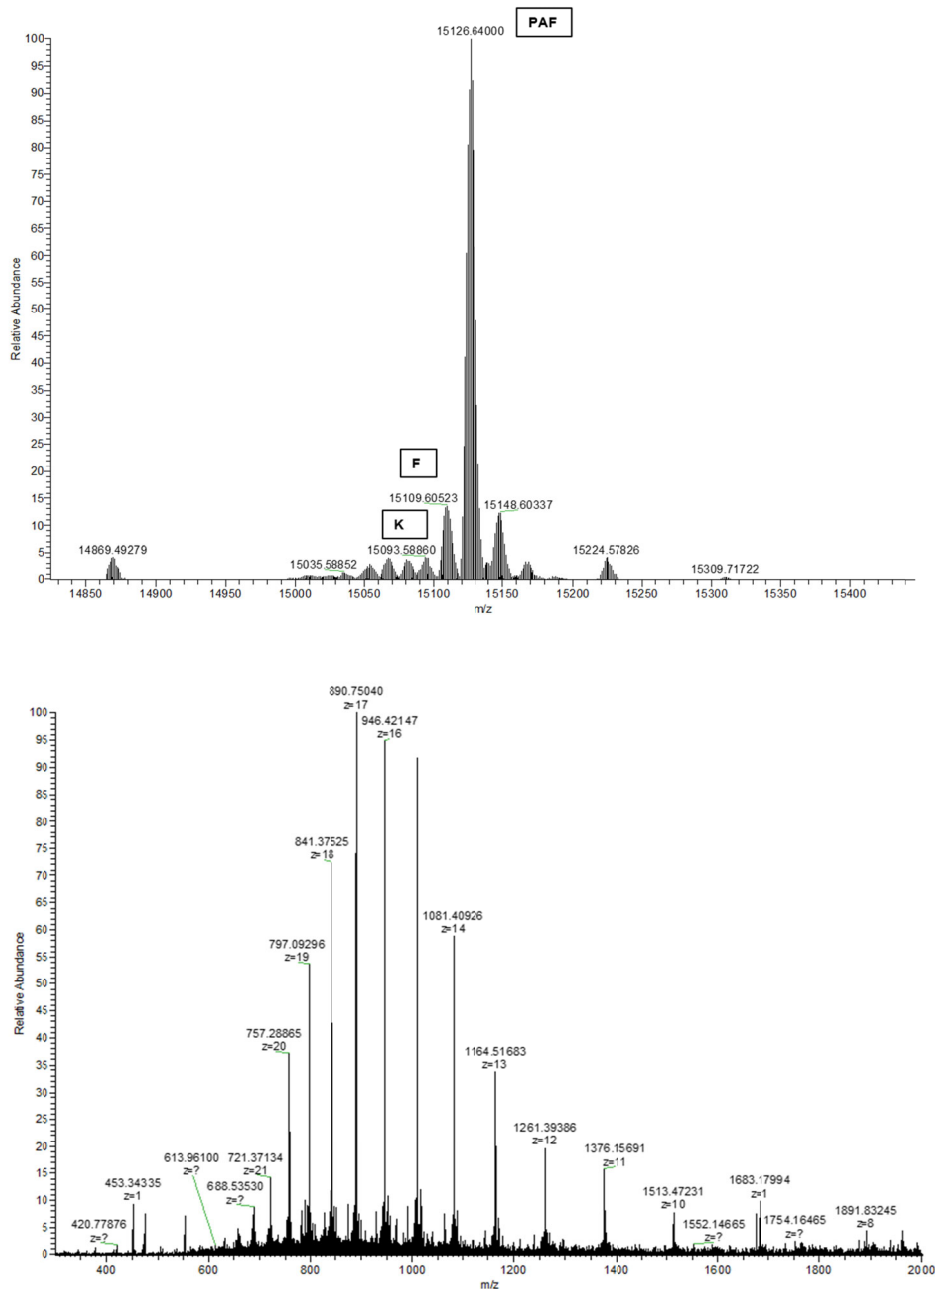

**Figure S6.** Mass of LmrR-V15pAF\_RMH expressed in MMV. After deconvolution, an observed mass of 15126.64, which corresponds to the expected mass of LmrR-V15pAF\_RMH, was detected. Although expression in this media gives some misincorporation of phenylalanine (F) and Lysine (K), around 80 % of incorporated amino acid was pAF (unnatural amino acid).

Mass spectrometry result sample from M9 minimal media of pAF incorporation into LmrR\_V15X\_RMH

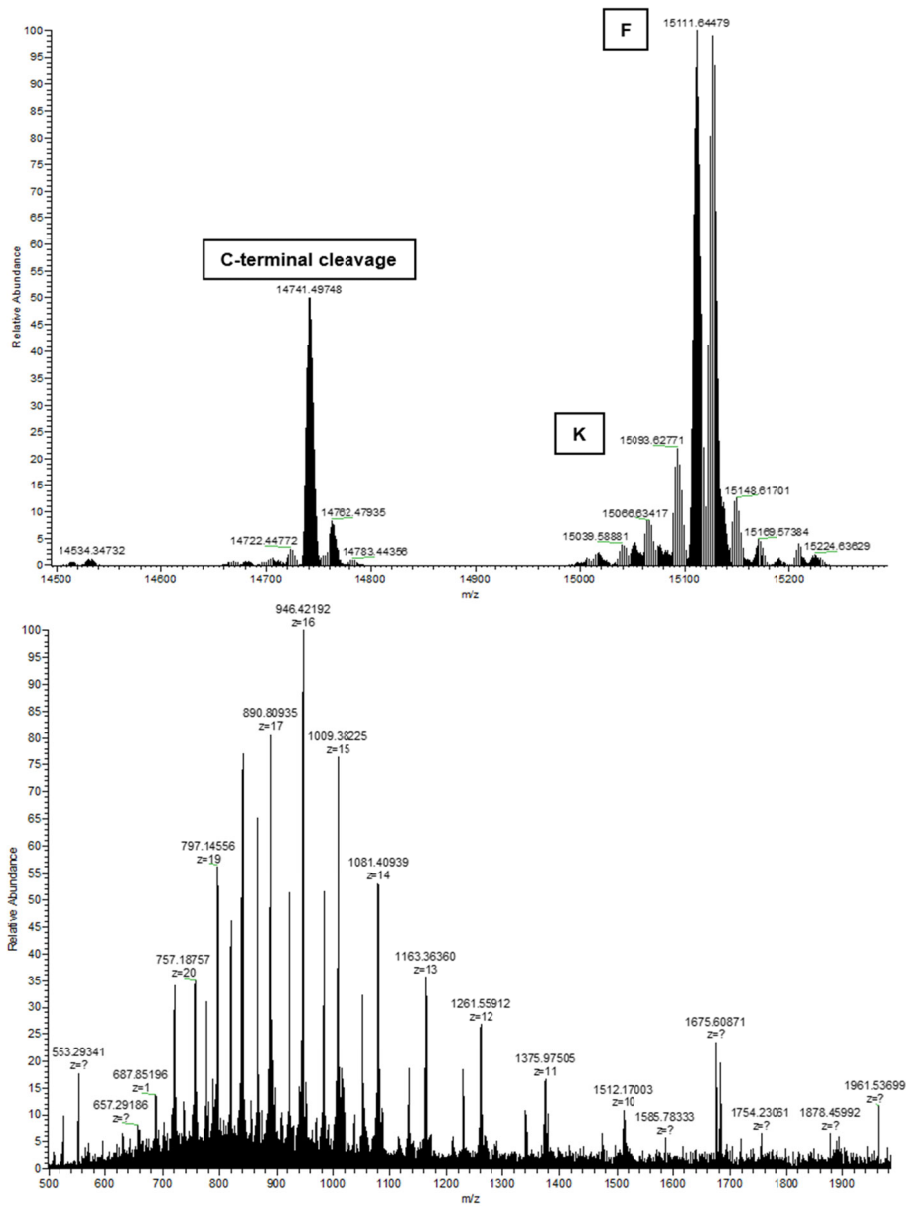

**Figure S7.** Mass of LmrR-V15X\_RMH expressed in M9 minimal media. After deconvolution, an observed mass of 15111.64 which corresponds to the expected mass of LmrR-V15X\_RMH when phenylalanine (F) is incorporation instead of pAF. A mass corresponding to the cleavage of 4 amino acids from the C-terminal was also detected as well as few misincorporation of Lysine (K).

Mass spectrometry result sample from LB media of pAF incorporation into LmrR\_V15X\_RMh

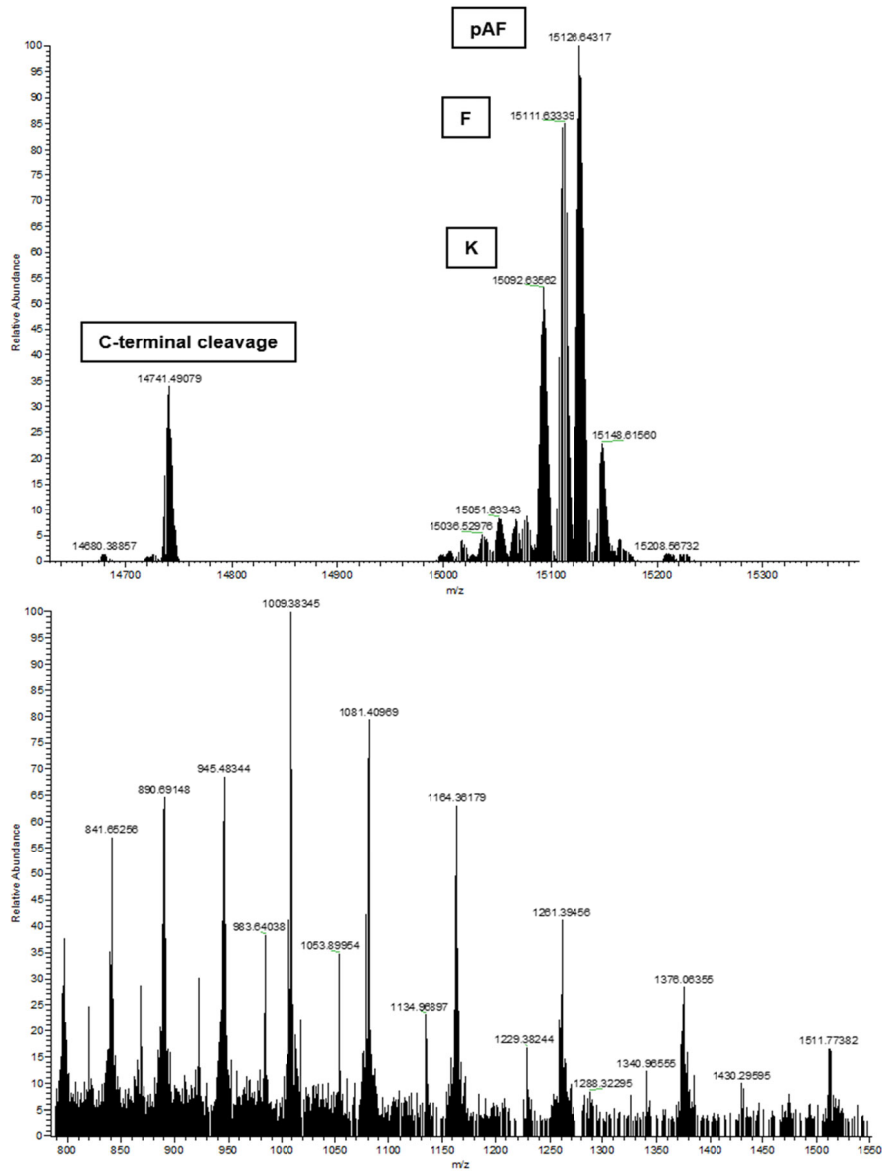

**Figure S8.** Mass of LmrR-V15X\_RMh expressed in LB media. Although after deconvolution an observed mass of 15126.64 which corresponds to the expected mass of LmrR-V15pAF\_RMh was detected, there was also a lot of misincorporation of phenylalanine (F) and Lysine (K). The presence of C-terminal cleavage was also detected as it was with M9 sample.

**Mass spectrometry result of negative control sample of pAF incorporation into LmrR\_V15X\_RMh**

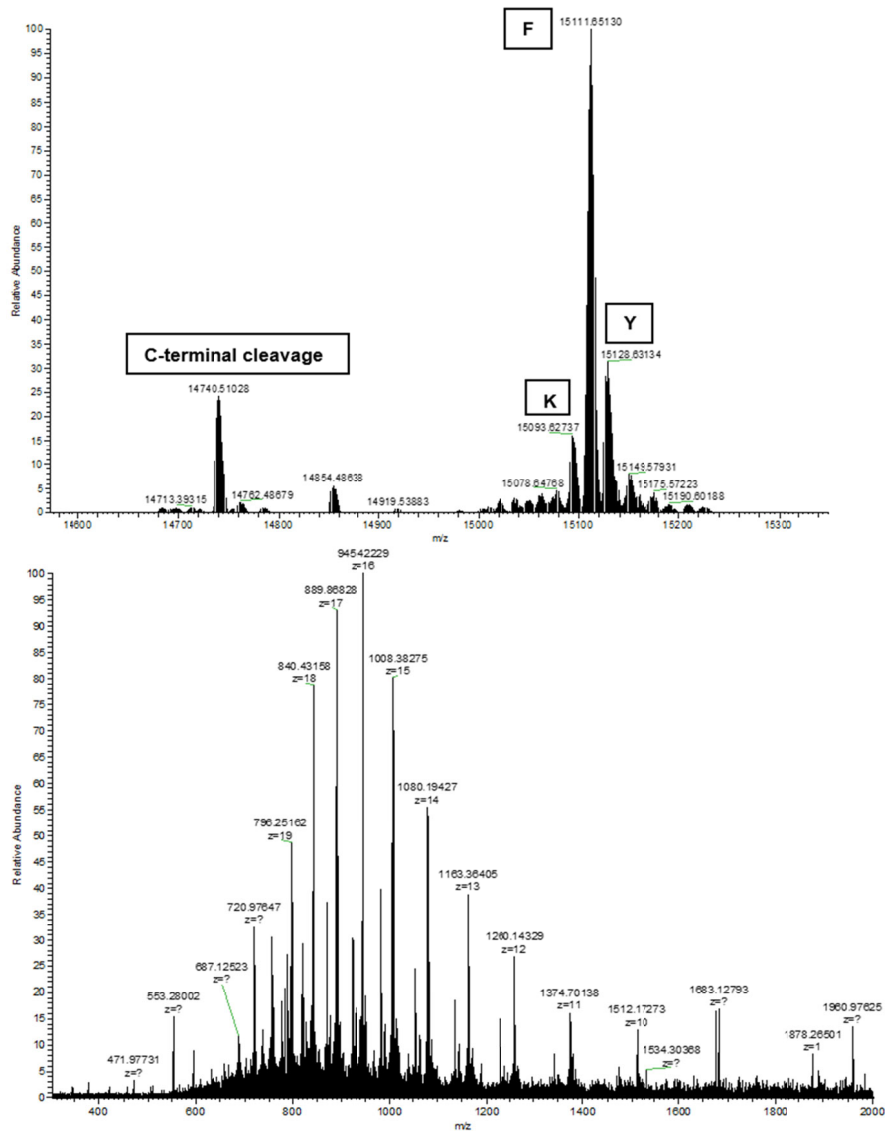

**Figure S9.** Mass of LmrR\_V15X\_RMh expressed in MMV without the addition of pAF unnatural amino acid. After deconvolution, an observed mass of 15111.65, which corresponds to the expected mass of LmrR\_V15F\_RMh was observed which indicates a major misincorporation of phenylalanine (F). Few misincorporation of lysine(K) and tyrosine (Y) were also detected.

All samples analysed had major misincorporation of phenylalanine (F). In LB this misincorporation was due to the fact, it is a rich medium and due the promiscuity of the pAF orthogonal translation system, (OTS) F is incorporated. The situation is the same for M9 minimal media, because it contains cas amino acids. Moreover, in the control sample in MMV where no pAF was added, there was a major misincorporation of F and few of K and Y although MMV is not a nutrient rich media. However, when pAF was added to the MMV culture, pAF became the main

amino acid (unnatural) incorporated. This means that in the presence of pAF in MMV, pAF is more preferred, and for this reason we choose to work with MMV.

### Uv-vis spectroscopy

After hydrazone formation reaction with para hydroxy benzaldehyde (**1a**) and NBDH (**2**), the absorbance of 1 ml of product **3a** solution was measured.

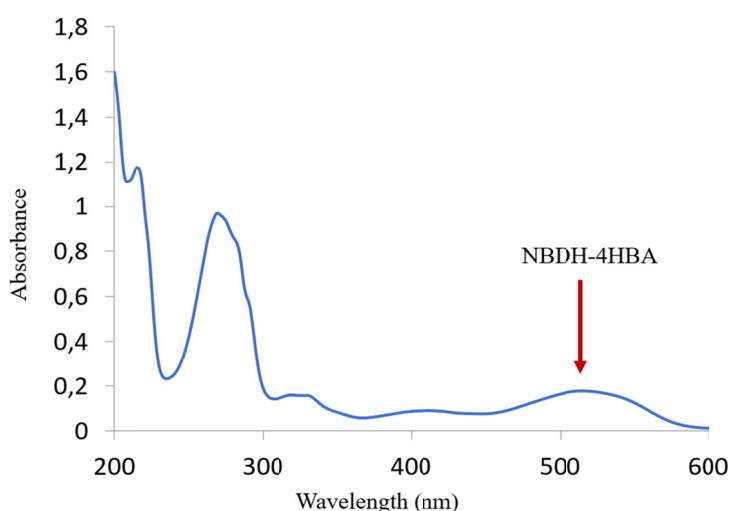

**Figure S10.** Uv-Vis spectra analysis of product **3a**. The characteristic absorption band of the NBDH-4HBA product (**3a**) was detected at a wavelength of 520 nm.

### UPLC-MS Analysis

Reactions samples were pelleted by centrifugation, and aqueous supernatant was collected and filtered with 2  $\mu\text{m}$  filter for UPLC-MS analysis using ACQUITY UPLC<sup>®</sup> HSS T3 1.8 $\mu\text{m}$ . The solvents used were (A) acetonitrile + 0.1% formic acid (TFA); (B) water +0.1% formic acid Run for 20 mins.

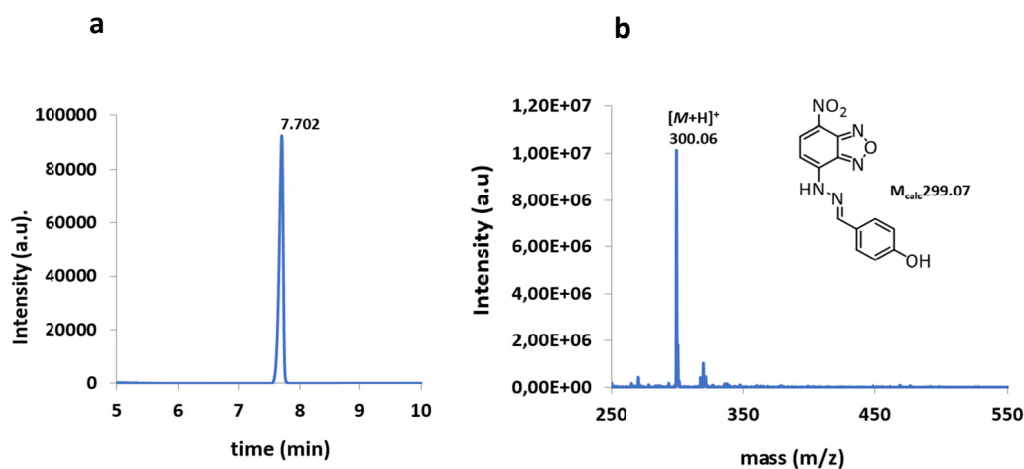

**Figure S11.** UPLC-MS analysis to confirm the mass of hydrazone product. (a) single peak at time 7.7 min corresponded to the retention time of hydrazone on the UPLC. (b)The mass of the calculated hydrazone was confirmed.

## **Hydrazone formation reaction *in vivo* / *in vitro***

**Hydrazone formation reaction *in vivo*:** Experimental culture cells were grown in 50 ml MMV supplemented with antibiotics at 37°C, 135 rpm until OD<sub>600</sub> of 0.4 – 0.7. Gene expression was induced with 1 mM isopropyl-β-d-1-thiogalactopyranoside (IPTG) and 0.02 % L- arabinose. During induction 1 mM pAF was added in solid form, incubated at 24 °C, and agitated at 135 rpm for 48 hrs. Cultures were pelleted and resuspended in newly prepared MMV, to wash away non-incorporated UAA, or in reaction buffer. In the 2.5 mL cell culture with newly prepared MMV medium was added 25 μL NBDH (**2**) (5 mM in DMF) solution (final concentration 50 μM) and 62.5 μL carbonic acid or aldehyde (200 mM in DMF) solution (final concentration 5 mM). Then the mixture was put into the 24 °C shaker at 135 rpm for 1 to 24 hours. The formation of the product was determined by HPLC. Take 500 μL reaction culture into 2 ml Eppendorf, added 50 μL IS (1 mM Fluorescein in DMF), then extracted with 1ml ethyl acetate, after the evaporation, the residue was resuspended in 1200 μL CH<sub>3</sub>CN. 200 μL of this solution was placed into HPLC vial and the sample was analyzed by HPLC.

**Hydrazone formation reaction *in vitro* was set-up as follows:** To 280 μL of 5 μM HMFO and 4 μM LmrR\_V15pAF\_RMH in freshly prepared phosphate buffer pH 6.5 was added 10 μL NBDH (1.5 mM in DMF) solution (final concentration 50 μM) and 10 μL carbonic acid (150 mM in DMF) solution (final concentration 5 mM). Then the mixture was put into the 24 °C shaker at 135 rpm for 1 to 3 hours. The yield of the products was determined by HPLC. To the reaction mixture was added 50 μL internal standard (1 mM Fluorescein in DMF), then it was extracted with 200 μL ethyl acetate. After the evaporation, the residue was resuspended in 240 μL CH<sub>3</sub>CN. 200 μL of this solution was placed into HPLC vial and the sample was analyzed by HPLC.

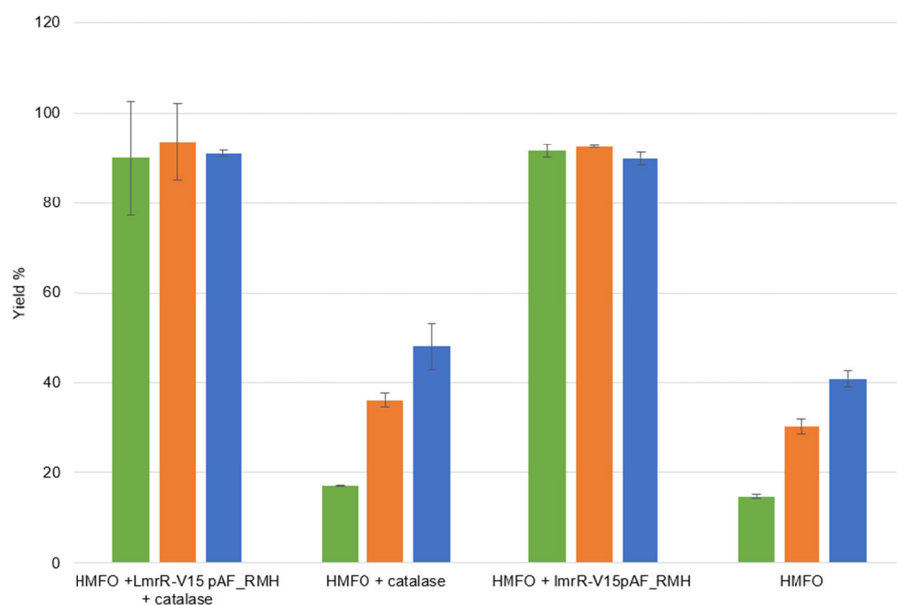

**Figure S12.** Hydrazone formation by the combination of HMFO and LmrR\_V15pAF\_RMH *in vitro*.

The *in vitro* reaction using the combination of HMFO and LmrR-V15pAF\_RMH gave 85% yield after 1 h (green). Monitoring at 2 h (orange) and 3 h (blue) didn't give rise to further increased product formation. The control experiments with catalase showed that  $H_2O_2$  has no effect on the cascade reactions.

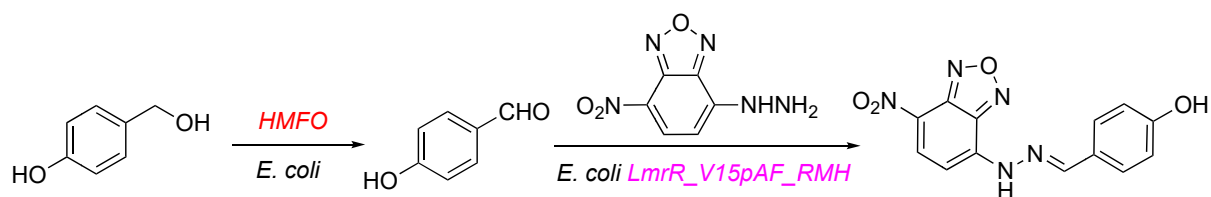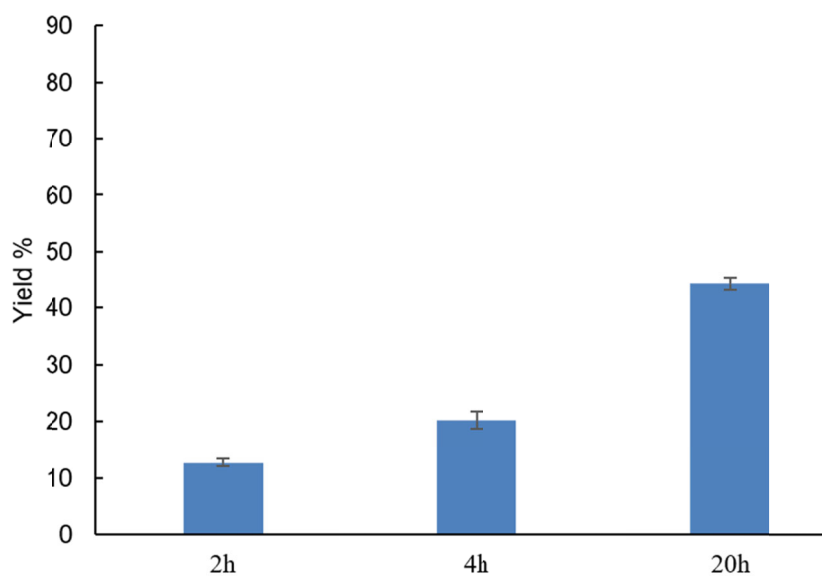

**Figure S13.** Hydrazone formation reaction of **1a** and **2** by integration of HMFO and LmrR\_V15pAF\_RMH *in vivo*. The reaction was followed during 20 h with a final yield of 50 % of product **3a** formed.



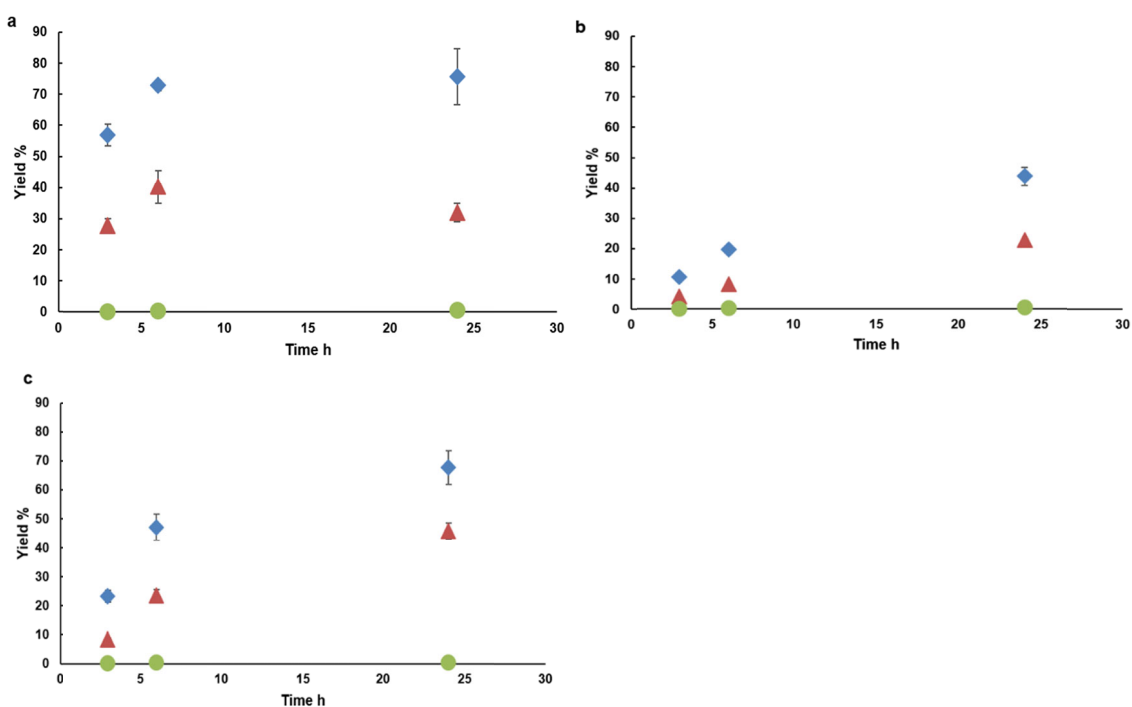

**Figure S14** Hydrazone formation *in vivo* after the integration of CAR-SFP and FCS-ECH with LmrR\_V15pAF\_RMH in *E. coli* K12 MG1655 (RARE), using MMV at 24 °C with 135 rpm for 24 h. (a) hydrazone formation using 5 mM **4b** and 50 μM **2**. CAR-SFP/LmrR\_V15pAF\_RMH (blue) gave 57%, 73% and 76% after 3, 6, and 24 h, respectively. Although CAR only (red) gave some background, LmrR\_V15pAF\_RMH only (green) did not yield any product. (b) 5 mM **4a** and 50 μM **2** (c) 5 mM **5** and 50 μM **2**, the trend was not different from (a). FCS-ECH\_LmrR\_V15pAF\_RMH (blue) gave 23%, 47%, and 68% of **3a** after 3, 6, and 24 h, respectively. The FCS-ECH only (red) gave a background of 46% after 24 h. The results for LmrR\_V15pAF\_RMH (green) were the same for all substrates (**4a**, **b**, **5**). Error margins represent standard deviations from experiments performed in triplicate.

### ***In vivo* hydrazone formation reaction with LmrR\_V15Y\_RMH variant**

The plasmid pET17b+ harbouring LmrR-V15Y-RMH was transformed into the *E. coli* strain K12 MG1655 (RARE). Experimental culture cells (both LmrR\_V15Y\_RMH and LmrR\_V15pAF\_RMH variants) were grown in 50 ml MMV supplemented with antibiotics at 37°C, 135 rpm until OD<sub>600</sub> of 0.6. Gene expression was then induced with 1 mM isopropyl-β-d-1-thiogalactopyranoside (IPTG) incubated at 24 °C, and agitated at 135 rpm for 48 hrs. Cultures were pelleted and resuspended in phosphate buffer at pH 7, to wash away non-incorporated UAA. In the 2.5 mL cell culture in buffer was added 25 μL NBDH (**2**) (5 mM in DMF) solution (final concentration 50 μM) and 62.5 μL benzaldehyde (200 mM in DMF) solution (final concentration 5 mM). Then the mixture was put into the 24 °C shaker at 135 rpm for 3 hours. The formation of the product was determined by HPLC. Take 500 μL reaction culture into 2 ml Eppendorf, added 100 μL IS (1 mM 2-phenylquinoline in DMF), then extracted with 1ml ethyl acetate, after the evaporation, the residue was

resuspended in 1200  $\mu\text{L}$   $\text{CH}_3\text{CN}$ . 200  $\mu\text{L}$  of this solution was placed into HPLC vial and the sample was analysed by HPLC.

The hydrazone product with LmrR\_V15pAF\_RMH variant had a higher yield of 86 % compared to that of LmrR\_V15Y\_RMH variant which gave a yield of 39 %, indicating that the pAF can catalyse the reaction better than tyrosine. This was done to proof that our protein had pAF incorporated and not tyrosine.

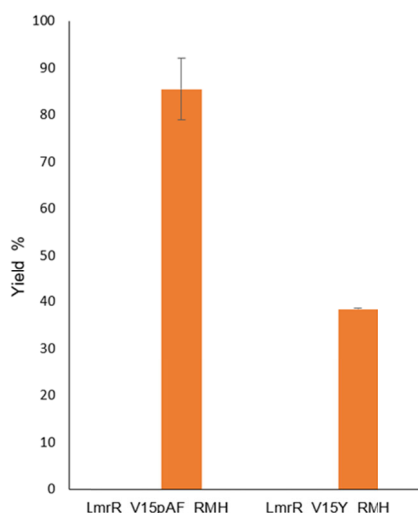

**Figure S15.** Yield **3b** of hydrazone product using phosphate buffer in E.coli K12 MG1655 (RARE). Conditions: 5 mM **1b** and 50  $\mu\text{M}$  **2** in phosphate buffer pH 7, at 24  $^{\circ}\text{C}$ / 135 rpm for 3 h. Error margins represent standard deviations from the average of duplicates.

### Background reaction of hydrazone formation

In finding out the main contributor to the background reaction in MMV, we decided to the reaction in MMV and buffer whereby the presence of some vitamins are increased (mainly aromatic amines) in some samples and limited in other samples to see the effect. Here, we set 3 different types of control reactions with 5 mM benzaldehyde and 50  $\mu\text{M}$  NBDH final concentration. The reaction was set up in phosphate buffer at pH 7, MVV media (with 2 mM Folic acid, 4-amino benzoic acid and thiamine x HCL) and MMV media (without p-aminobenzoic acid) and incubated at 24  $^{\circ}\text{C}$ /135 rpm for 2 h. 500  $\mu\text{L}$  reaction mix was taken at the beginning and at the end of the reaction for extraction, product was extracted with 0.9 ml ethyl acetate and 0.1 ml of 1 mM internal and was then detected with the HPLC.

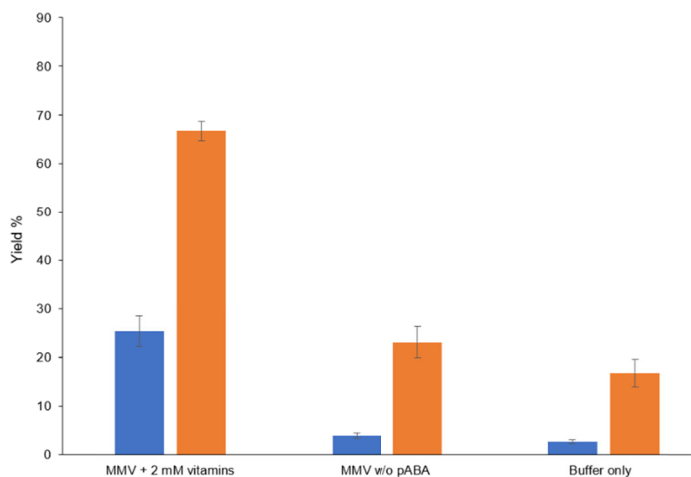

**Figure S16.** Yield of hydrazone product formed in control samples for 10 mins (blue) and 2 h (orange). Samples with MMV and 2 mM vitamins ( folic acid, thiamine and 4-amino benzoic acid) had a higher product detection, both at the beginning and at the end of the reaction (25% and 67% respectively). Meanwhile that of MMV without 4-amino benzoic acid and buffer had lower yields of 4% and 3% after 10 mins and 23% and 17% after 2 h. This clearly shows that the background reaction is caused by the presence of aromatic amines in MMV.

### HPLC Chromatogram for hydrazone

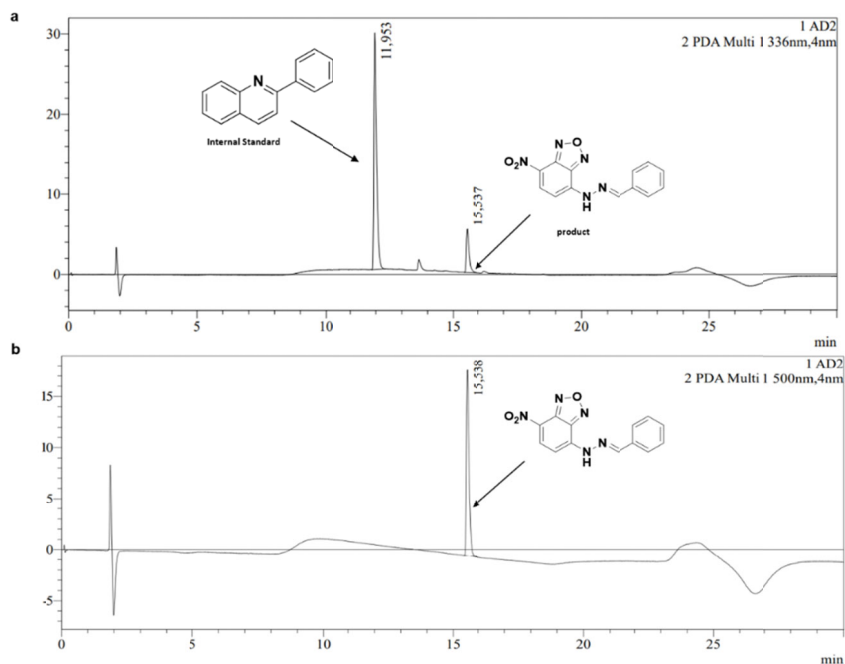

**Figure S17.** HPLC chromatogram of Hydrazone product **3b** formed by integration of HMFO and LmrR\_V15pAF\_RMh *in vivo*.  
(a) At wavelength 336 nm. (b) At wavelength 500 nm.

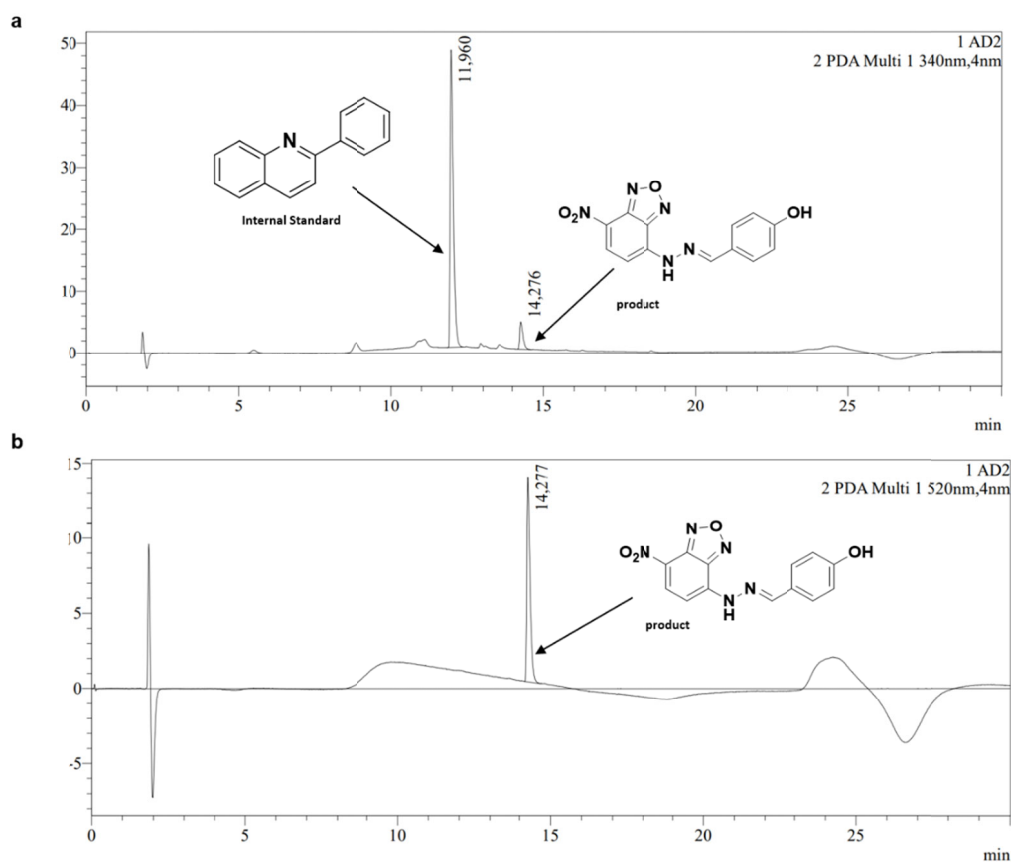

**Figure S18.** HPLC chromatogram of Hydrazone product **3b** in the presence only HMFO *in vivo* (i.e. in absence of LmrR\_V15pAF\_RMH). (a) At wavelength 336 nm. (b) At wavelength is 500 nm.

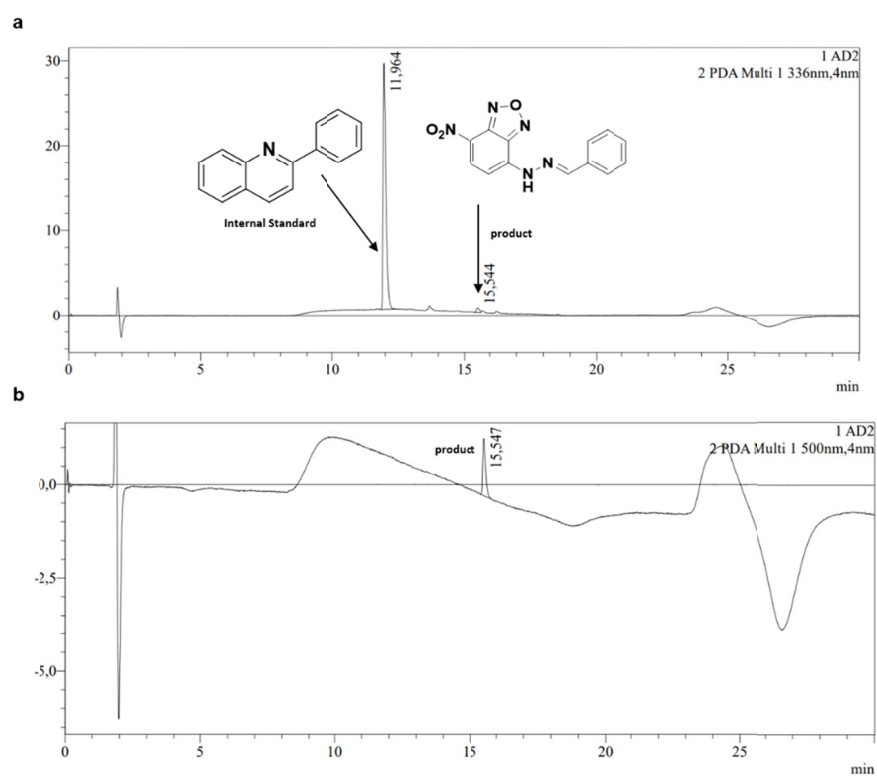

**Figure S19.** HPLC chromatogram of Hydrazone product **3a** formed by integration of HMFO and LmrR\_V15pAF\_RMH *in vivo*. (a) At wavelength 340 nm. (b) At wavelength is 520 nm.



Mass after reductive amination, LmrR\_V15pAF\_RMH variant

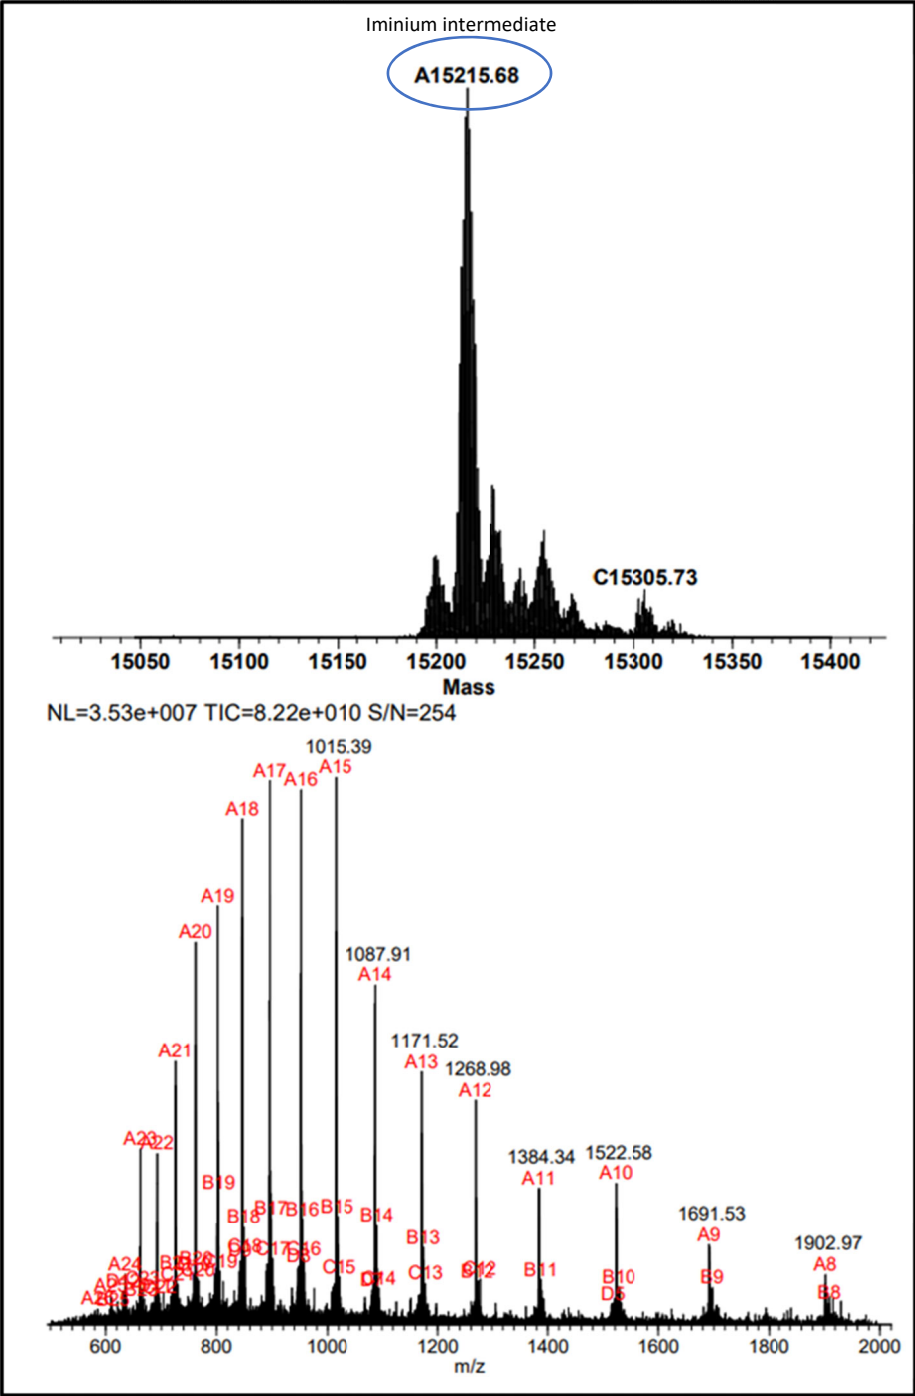

Expected mass = 15216: observed mass = 15215.68

Mass before reductive amination, LmrR\_V15Y\_RMH variant

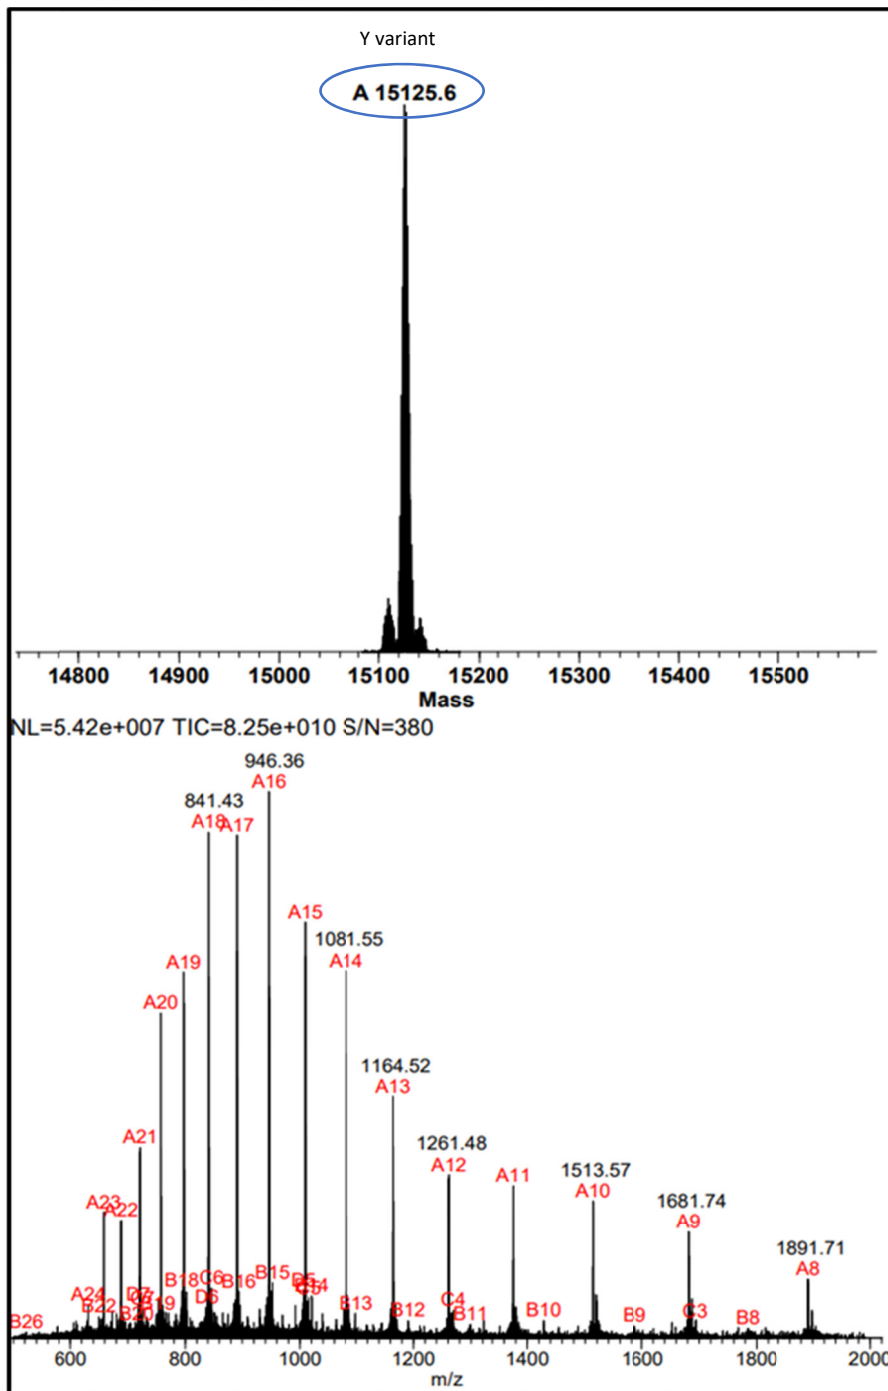

Expected mass = 15127; observed mass = 15125.6

## Mass after reductive amination, LmrR\_V15Y\_RMH variant

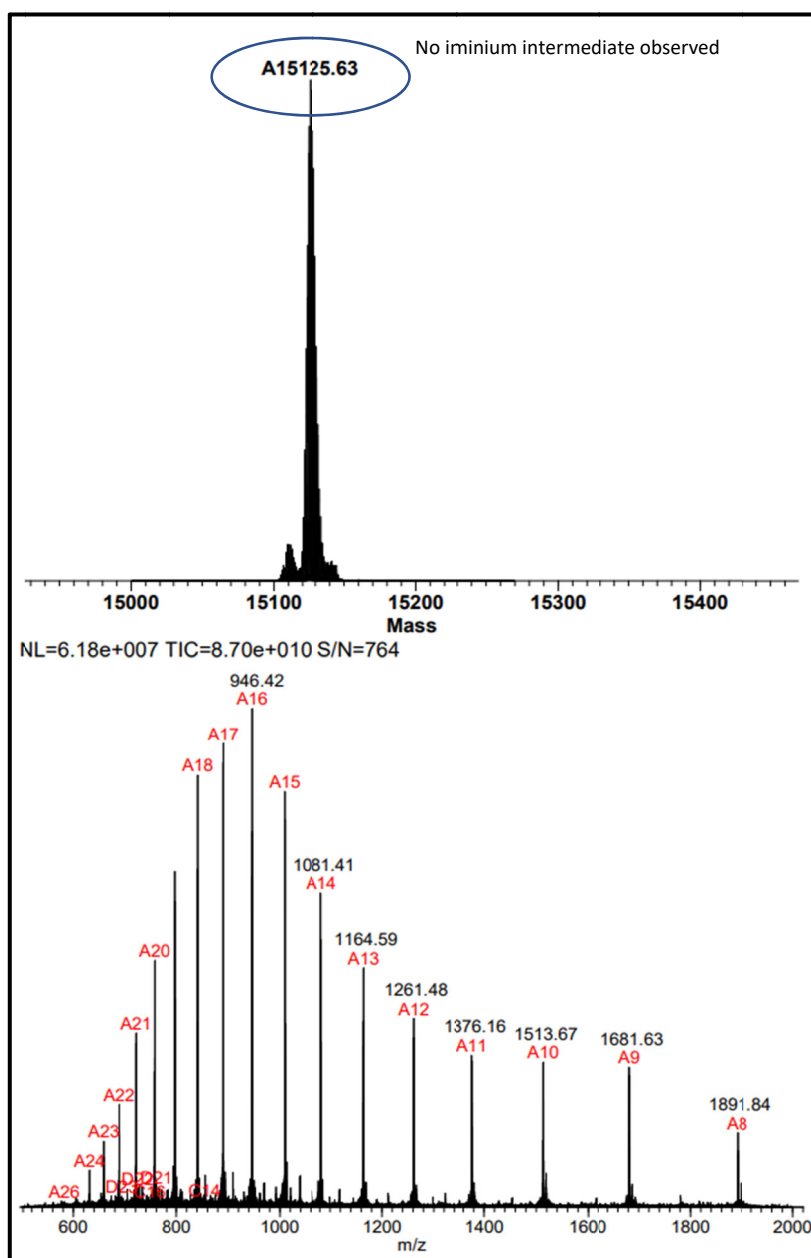

Expected mass = 15127; observed mass = 15125.63

**Figure S20.** Mass spectrometry for LmrR\_V15pAF\_RMH and LmrR\_V15Y\_RMH before and after trapping of the transiently formed iminium ion in the presence of benzaldehyde and NaCNBH<sub>3</sub>. According to the mass spectrometry, the mass of the LmrR\_V15pAF\_RMH variant after reductive amination corresponded to the expected mass of the iminium ion formed with pAF in the presence of benzaldehyde and NaCNBH<sub>3</sub>. On the other hand, there was no iminium intermediate formed with the LmrR\_V15Y\_RMH as expected. This confirmed our argument that, pAF was successfully incorporated into LmrR\_V15X\_RMH.



## Recycling Experiment

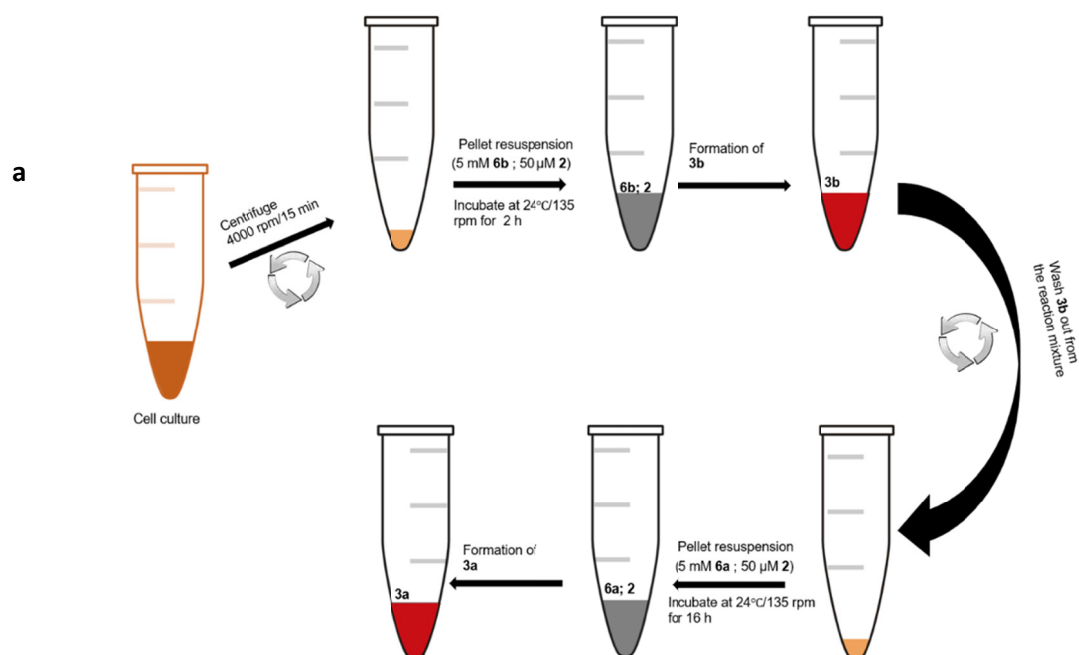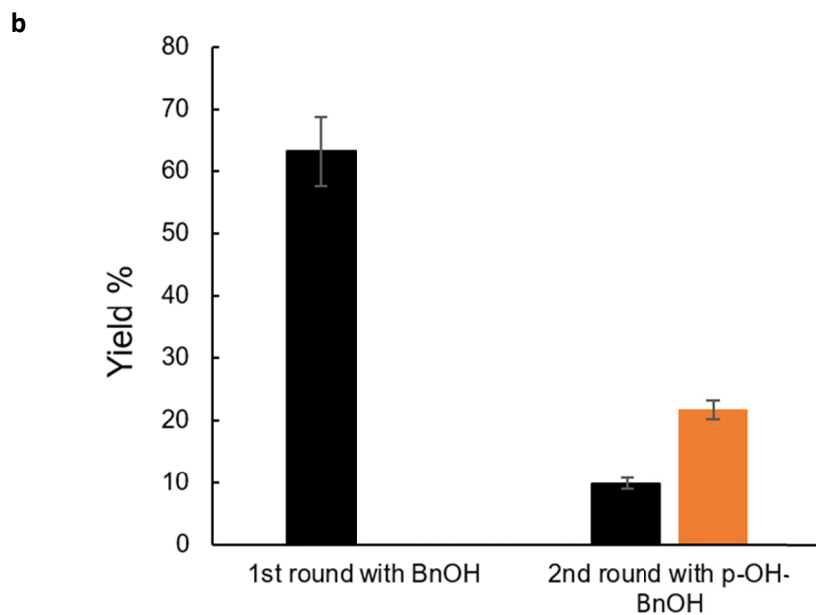

**Figure S21.** Recycling experiment to establish that catalysis takes place in the cell and the cell remains intact during and after catalysis (**a**) Schematic workflow of an *in vivo* recycling experiment of hydrazone formation reaction using HMFO/LmrR\_V15pAF\_RMh. Products (**3a,b**) were analyzed with the HPLC after extraction. (**b**) Product yields detected after each catalysis experiment, first round of reaction resulted in 63 % of **3b** (black) and the second round yielded 22 % of **3a** (orange) with 10 % residual **3a**.

### Cell viability test after catalysis

After the *in vivo* catalysis, reaction mixtures were spun down at 8000 rpm for 30 mins and resuspended in LB medium. Serial dilutions ( $10^x - 10^{-8}$ ) of selected samples were plated on LB plates containing 100  $\mu\text{g}/\text{mL}$  ampicillin, 10  $\mu\text{g}/\text{mL}$  spectinomycin and 50  $\mu\text{g}/\text{mL}$  Kanamycin for 3 plasmid system and plates containing 100  $\mu\text{g}/\text{mL}$  ampicillin and 10  $\mu\text{g}/\text{mL}$  spectinomycin for 2 plasmid system. Plates were then incubated at 37 °C overnight. The following day, colonies were counted, plates with  $10^x$  diluted were confluent and therefore not countable. However plates with dilutions

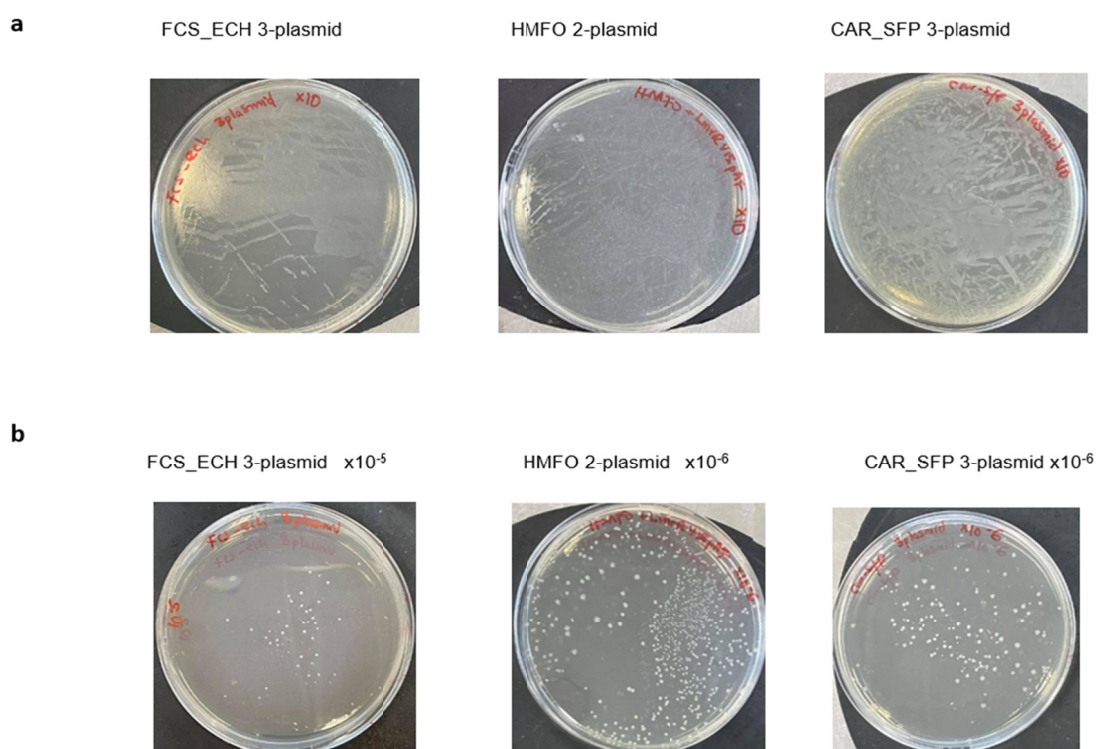

from  $10^{-5}$  were countable.

**Figure S22.** Cell viability test after hydrazone formation reaction. (a) Image of the confluency of colonies after 10 times dilution. (b) Plate with FCS-ECH 3-plasmid had 45 colonies, HMFO 2-plasmid had 336 colonies and CAR-SFP 3-plasmid had 141 colonies after several serial dilutions.

After the viability test, LmrR\_V15pAF\_RM/HMFO system was used to repeat the cell viability test and this time with 2 different substrates. After protein expression at 24°C/135 rpm for 48 hours, cultures were collected and spun down at 4000 rpm for 10 mins. The pellet was resuspended in 50 mM potassium phosphate buffer at pH 6.5, reaction was

performed by adding 5 mM of benzylalcohol and 50  $\mu\text{M}$  of NBD-H to the cell and incubated at 24°C/135 rpm for 2 hours. The reaction mixtures were then spun down and the cells resuspended in LB media, serial dilutions were done down to  $10^{-6}$  and 200  $\mu\text{l}$  was plated on LB agar each dilution and incubated at 37°C overnight. A single colony from the  $10^{-6}$  dilution plate was picked and grown in LB media while expressing LmrR\_V15pAF\_RMH/HMFO. Catalysis was performed as previously described with the new cells, now using 5 mM p-hydroxybenzyl alcohol and 50  $\mu\text{M}$  NBDH as substrates in 50 mM potassium phosphate buffer at pH 6.5. After overnight reaction at 24°C/135 rpm, the samples were again spun down, resuspended in LB and serial dilutions down to  $10^{-9}$  were plated on agar. Colonies on the plates with  $10^{-8}$  and  $10^{-9}$  dilutions yielded 419 and 60 colonies respectively.

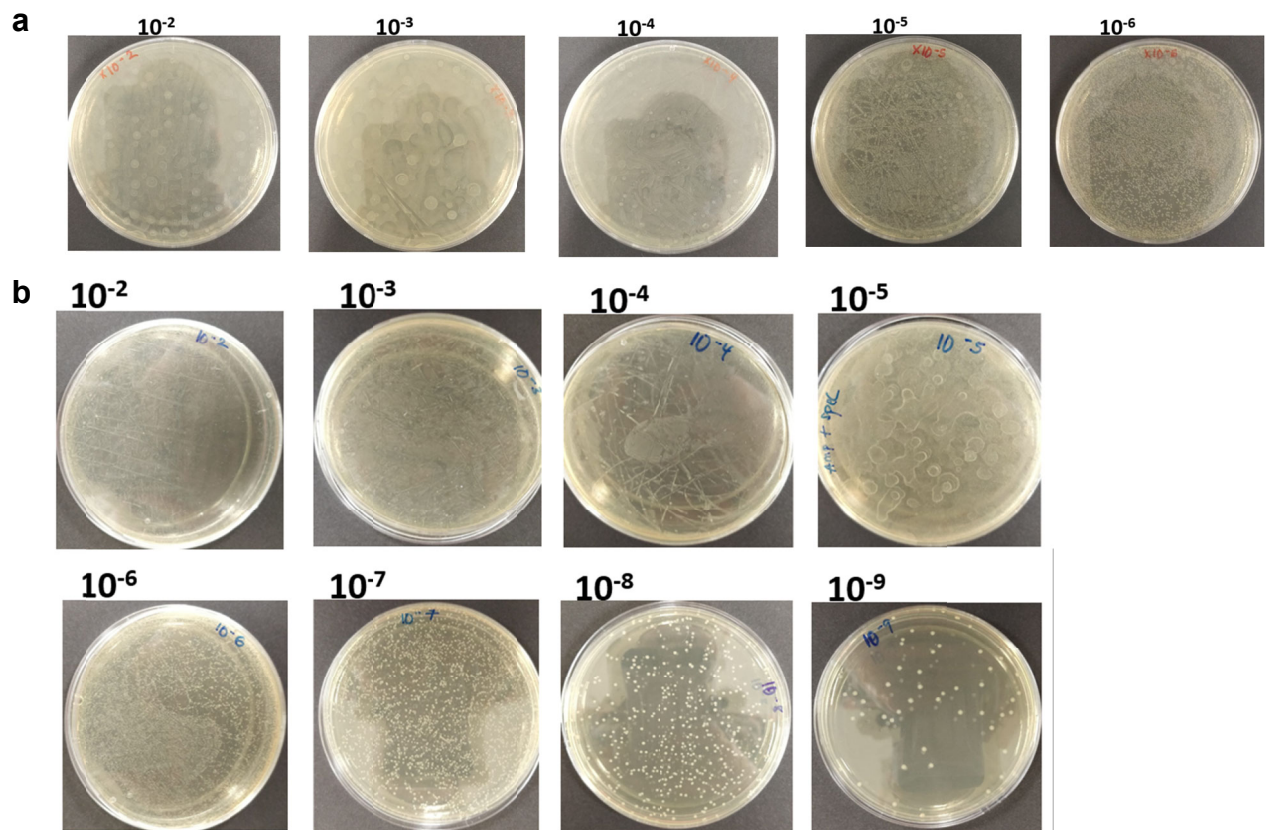

**Figure S23.** Agar plates with colonies after viability test with LmrR\_V15pAF\_RMH/HMFO system (a) images of colony plates after the first round of catalysis with 5 mM of benzylalcohol and 50  $\mu\text{M}$  of NBD-H for 2 hours. (b) Colony plates after second round of catalysis 5 mM p-hydroxybenzyl alcohol and 50  $\mu\text{M}$  NBDH for overnight. Colonies counted on the  $10^{-8}$  and  $10^{-9}$  plates were estimated to be  $6 \times 10^7$  cells/ml for plate  $10^{-8}$  and  $2 \times 10^7$  cells/ml for plate  $10^{-9}$  viable cells after catalysis, compared to  $1.92 \times 10^{10}$  cells/ml at the onset.

## Gene sequence used in the work

### *LmrR-V15TAG RMH*

ATGGGTGCCGAAATCCCGAAAGAAATGCTGCGTGCTCAAACCAATTAGATCCTGCTGATGGTCCTGAAACAA  
GGCGATAACTATGTGTATGGCATTATCAAACAGGTGAAAGAAGCGAGCAACGGTCAAATGGAAGTGAATGAA  
GCCACCCTGTATACGATTTTTGATCGTCTGGAACAGGACGGCATTATCAGCTCTTACTGGGGTGTGAAAGT  
CAAGGCGGTCTGCGCAAATATTACCGTCTGACCGAAATCGGCCATGAAAACATGCGCCTGCGGCATGAATC  
CTGGAGTCGTGGACAAAATCATTGAAAATCTGGAAGCAAACAATAAATCTGAAGCGATCAAATCTAGAGG  
TGGCAGCGGTGGCTGGAGCCACCCGCAGTTCGAAAAATAA

### *HMFO*

ATGACTGATACGATTTTTGACTACGTGATTGTTGGCGGTGGCACGGCGGGTAGCGTTCTGGCCAACCGTCT  
GTCCGCCCGTCCGGAGAATCGCGTGTTGCTGATTGAGGCCGGTATTGATACCCCGAAAACAATATTCCGC  
CGGAGATCCACGATGGCCTGCGCCCGTGGCTGCCGCGTCTGAGCGGTGATAAGTTCTTTTTGGCCGAATCT  
GACCGTCTACCGTGCCGCGGAACACCCGGGTATCACGCGCGAGCCGCAGTTCTATGAACAAGGCCGTCTG  
CTGGGCGGTGGTAGCAGCGTGAACATGGTCGTTTCTAACCGTGGTCTGCCTCGCGACTATGACGAATGGCA  
GGCACTGGGCGCAGATGGTTGGGATTGGCAGGGTGTCTGCCGTAATCATCAAGACCGAGCGTGACGCG  
GACTACGGTGACGACCCGTTGCATGGCAATGCGGGTCCGATTCCGATCGGTGCGGTGATTGCGGTCACT  
GGAGCGACTTCACGGTGGCGGCAACCCAAGCTCTGGAAGCGGTGGCCTGCCGAACATTCACGACCAAAA  
CGCACGTTTTGATGACGGTTACTTCCCACCGCATTTACGTTGAAAGGTGAAGAGCGCTTCAGCGCCGCAC  
GCGGTTATCTGGATGCGAGCGTCCGTGTGCGTCCGAACCTGAGCCTGTGGACTGAGAGCCGTGTCCTGAA  
GCTGTGACCACTGGCAATGCAATCACCGGTGTGAGCGTGTGCGTGGTGGTGGTGGTGGTGGTGGTGGTGG  
CGCGCGAGGTCATCCTGACCGCCGGTGCCTTCAAAGCCAGCGATTCTGTTGCGCACCGGCATCGGCC  
TGCGGCGGATCTGCACGCACTGGGTATTCTGTTCTGGCAGACCGTCCGGGTGTTGGTGGTGGTGGTGGTGG  
GAGCACAGCTCTATCGGTGTGGTTGCCCGCTGACCGAGCAGGCACGTGCAGACGCCAGCACGGGTAAAG  
CCGGCTCTCGCCATCAACTGGGTATCCGTGCGTGTCCGGCGTAGATCCGGCGACGCCAGCGACCTGTT  
TCTGCATATCCATGCTGATCCAGTCAGCGGTCTGGCAAGCGCTCTGTTCTGGGTGAACAAGCCAAGCTCCA  
CCGGCTGGCTGAAGCTGAAGGACGCGGACCCGTTTAGCTACCCGACGTAGACTTCAATCTGCTGAGCGAT  
CCGCGCGACTTGGGTGCTCTGAAAGCGGGCCTGCGTCTGATCAAACATTAATTCGCATATCCGTCCCTGGC  
GAAATATGGTTTTGGCGCTGGCATTGAGCCGTTTTGAGGCACCGCAGCCGGGTGGTCCGCTGCTGAACGAC  
CTGTTGCAGGACGAAGCCGCCCTGGAACGCTATTTGCGTACGAACGTGCGCGGTGTTTGGCATGCGAGCG  
GCACGGCGCGTATCGGCCGTGCGGATGATTCCCAGGCTGTTGTCGATAAAGCGGGTGTGTGTACGGCGT  
CACCGCCTGCGTGTTCGGGACGCAAGCATTATGCCGACCGTTCGACCGCAATACCAATCTGCCGACG  
CTGATGCTGGCTGAGAAAATTGCGGATGCGATTCTGACCCAGGCTTAA

### *CAR-SFP*

CCATGGGCGAGCAGCCATCACCATCATCACCACAGCCAGGATCCGAATTCGATGGCTGTGGACTCGCCGGAT  
GAACGCCTGCAACGCCGTATCGCCAACTGTTTGCCGAAGATGAACAAGTGAAGCTGCCCGCCCGCTGGA  
AGCAGTTAGCGCGGCCGTCTCTGCACCGGTATGCGTCTGGCTCAGATCGCAGCTACGGTGTGGCTGGT  
TATGCGGATCGTCCGGCGGGCCAGCGTCTTTGAACTGAATACCGATGACGCAACCGGCCGTACCA  
GCCTGCGTCTGCTGCCGCTTTTCAAACATTACGTACCGCAACTGTGGCAGCGTGTCCGGCAAGTGGCA  
GCTGCGTGGCATCACGACCCGAAAACCCGCTGCGTGCAGGTGATTTTGTGGCCCTGCTGGGCTTCACCA  
GCATTGATTATGCAACGCTGGATCTGGCTGACATCCATCTGGGTGCGGTTACCGTGGCGTGAAGCGAGC  
GCGGCGGTGTCCAACTGATTGCAATCCTGACCGAAACGAGTCCGCGCCTGCTGGCGTCCACCCCGAAC  
ATCTGGATGCTGCGGTGGAATGCCTGCTGGCAGGCACCACGCCGAACGTCTGGTGGTTTTCGATTATCAC  
CCGGAAGATGACGATCAGCGCGCCGATTTGAAAGTGCAGCGTCCCGTCTGGCAGATGCAGGTTCCCTGG  
TGATCGTTGAAACCCTGGACGCGGTGCGTGCAGGTGGCCGTGATCTGCCGGTGCAGCGCTGTTTGTCCC  
GGATACCGACGATGACCCGCTGGCGCTGCTGATTATACGTGAGGTTGACCGGCACGCCGAAAGGTGCC  
ATGTACACCAATCGTCTGGCCGCAACGATGTGGCAGGGCAACTCAATGCTGCAAGGCAACAGCCAACGCGT  
TGGCATTAACTGAATTATATGCCGATGAGTCATATTGCGGGTGCATCTCCCTGTTCCGGCTGCTGGCGCG

TGGCGCACCCGATACTTTGCTGCGAAATCAGACATGAGCACCCCTGTTTGAAGATATTGGCCTGGTTCGCC  
CGACCGAAATCTTTTTCGTTCCGCGTGTCTGTGACATGGTGTTCAGCGCTATCAAAGCGAACTGGATCGCC  
GTTCTGTGCTGGTGC GGATCTGGACACCCTGGACCGCGAAGTGAAAGCGGATCTGCGTCAGAATTACCTG  
GGCGGTGCGTTCCTGTTGACAGTCGTGGGCTCGGCTCCGCTGGCCGCAGAAATGAAAACGTTTATGAAA  
GCGTGTGGACCTGCCGCTGCATGATGGTTATGGCAGTACCGAAGCCGGCGCATCCGTTCTGCTGGATAAC  
CAGATCCAACGTCCGCCGGTCTGGACTATAAACTGGTCGATGTGCCGGAACCTGGGTTACTTTGCGACGGA  
TCGTCCGCACCCGCGTGCCGAACTGCTGCTGAAAGCAGAAACCACGATTCCGGGTTATTACAAACGCCCGG  
AAGTTACGGCGGAAATCTTTGATGAAGACGGCTTCTATAAAACCGGCGATATTGTGGCCGAACTGGAACATG  
ACCGCCTGGTTTACGTGGATCGTCGTAACAATGTTCTGAAACTGTCCCAGGGCGAATTTGTGACCGTTGCGC  
ACCTGGAAGCTGTGTTCCGCGAGCAGCCCGCTGATCCGTCAAATTTTTATCTATGGTAGTTCCGAACGCAGTT  
ACCTGCTGGCCGTCATTGTGCCGACCGATGACGCACTGCGTGGCCGCGATACCGCTACGCTGAAAAGCGC  
TCTGGCGGAATCTATTACGCGTATCGCCAAAGACGCAAATCTGCAACCCTATGAAATCCGCGCGATTTTCT  
GATCGAAACCGAACCGTTCACGATTGCCAATGGCCTGCTGAGCGGTATCGCAAACTGCTGCGCCCGAACCC  
TGAAAGAACGTTATGGTGCAGCTGGAACAAATGTACACCGACCTGGCTACGGGCCAGGCAGATGAACTG  
CTGGCCCTGCGCCGTGAAGCTGCGGATCTGCCGGTGTGAAACCGTTAGCCGTGCCGAAAAGCGATGC  
TGGGTGTGGCAAGCGCGGATATGCGTCCGACGCACATTTTACCGATCTGGGCGGTGACAGCCTGTCTGC  
ACTGAGTTTTTCCAACCTGCTGCACGAAATCTTCGGTGTGAAAGTCCCGGTGGGTGTTGTGCTGTCTCCGGC  
AAACGAACTGCGTGTATCTGGCGAATTATATTGAAGCCGAACGCAACAGTGGCGCAAAACGTCACCTTCA  
CGTCAGTGCATGGCGGTGGCTCGGAAATTCGTGCTGCGGATCTGACCCTGGACAAATTTATCGATGCACGC  
ACGCTGGCCGACGCTGATTCTATTCCGCACGCCCGGTGCCGGCACAGACCGTTCTGCTGACGGGTGCGA  
ATGGCTATCTGGGTGCTTTCCTGTGCTGGAATGGCTGGAACGCCTGGATAAAACCGGCGGCACCCCTGATT  
TGTGTTGTCCGTGGTAGCGACGCGGCGGCGCACGTAACGTCTGGATTACGCTTTGATAGCGGCGATC  
CGGGCCTGCTGGAACATTATCAGCAACTGGCAGCACGTACCCTGGAAGTGCTGGCAGGCGATATTGGTGAC  
CCGAACCTGGGCTGGATGACGCGACCTGGCAGCGTCTGGCAGAAACGGTCGATCTGATTGTGCATCCGG  
CAGCTCTGGTGAATCACGTTCTGCCGTACACCCAGCTGTTTGGCCGAACGTGGTTGGCACCCGCGGAAAT  
GTGCGCCTGGCTATCACCGCGCGTGTAAACAGTGACCTATCTGTCTACGTTGGCGTGCAGATCAGGT  
TGACCCGGCTGAATACCAAGAAGATAGCGATGTGCGTGAATGTCTGCGGTGCGTGTGCTGCGCGAAAGCT  
ATGCCAACGGTTACGGCAATTCTAAATGGGCTGGTGAAGTGCTGCTGCGCGAAGCGCATGATCTGTGCGGT  
CTGCCGGTGGCAGTTTTTCGTTTACGATATGATTCTGGCACACTCGCGCTATGCTGGTCAGCTGAATGTCCAA  
GATGTGTTACCCGTCTGATTCTGTCACTGGTTGCTACGGGCATCGCGCCGATTTCGTTTTACCGCACCGAT  
GCAGACGGTAACCGTCAGCGCGCCATTACGATGGTCTGCCGGCAGATTTACCGCGGGCGGCGATTACGG  
CGCTGGGTATCCAGGCCACCGAAGGCTTTCGCACGTATGATGTGCTGAATCCGTATGATGACGGTATTAGT  
CTGGACGAATTTGTTGATTGGCTGGTGAATCCGGCCATCCGATTACGCGTATCACGGATTATTACAGACTGG  
TTTACCGCTTCGAAACCGCCATCCGTGCACTGCCGAAAAACAGCGTCAAGCCAGCGTGCTGCCGCTGCT  
GGATGCATACCGTAACCCGTGTCGGGCCGTTCCGCGGTGCAATTCTGCCGGCTAAAGAATTTACGGCTGCGG  
TCCAAACCGCGAAAATTGGCCCGGAACAGGATATTCCGCACCTGAGTGCCCCGCTGATTGATAAATACGTG  
TCTGACCTGGAACCTGCTGCAACTGCTGGGTAGTGGCTCTGGAAGTGGTGGTGGCCTGATGCACGTGATGCA  
GAAGCGCAGCCGCGCCATCCACTCCTCCGACGAAGGGGAGGACCAGGCTGGCGATGAAGATGAAGATTGA  
GCGGCCGC

**FSC**

GGATCCGGTGCGTAACCAGGGTCTGGGTTCTTGCCGGTTCGTGCTGCTCGTATGTCTCCGCACGCTACCG  
CTGTTGCTCACGGTGGTACCGCTCTGACCTACGCTGAACTGTCTCGTCTGTTGCTGCTGGCTCACGGT  
CTGCGTGAAGCTGGTGTTCGTCCGGGTGACCGTGTGCTTACCTGGGTCCGAACCACCCGGCTTACCTGGA  
AACCTGTTGCTTGC GGTCAGGCTGGTGTGTTTTCGTTCCGCTGAACTTCCGTCTGGGTGTTCCGGAAC

GGACCACGCTCTGGCTGACTCTGGTGCTTCTGTTCTGATCCACACCCCGAACACGCTGAAACCGTTGCTG  
CTCTGGCTGGTGACCGTCTGCTGCGTGTTCGGCTGGTGAAGTCTGCTGACGACGAACCGCTGGA  
CCTGCCGGTTGGTCTGGACGACGTTTGCCTGCTGATGTACACCTCTGGTTCTACCGGTCGTCGAAAGGTG  
CTATGCTGACCCACGGTAACCTGACCTGGAAGTTCGTTAACGTTCTGGTTGAAACCGACCTGGCTTCTGAC  
GAACGTGCTCTGGTTGCTGCTCCGCTGTTCCACGCTGCTGCTCTGGGTATGGTTTGCCTGCCGACCCTGCT  
GAAAGGTGGTACCGTTATCCTGCACTCTGCTTTCGACCCGGGTGCTGTTCTGTCTGCTGTTGAACAGGAAC  
GTGTTACCCTGGTTTTCGGTGTTCCGACCATGTACCAGGCTATCGCTGCTCACCCGCGTTGGCGTTCTACC  
GACCTGTCTTCTCTGCGTACCCTGCTGTGCGGTGGTCTCCGGTTCGGCTGACCTGGCTGGTCGTTACCT  
GGACCGTGGCCTGGCGTTCGTTACGGTTACGGTATGACCGAAGTCTGCTCCGGGTGTTCTGGTTCTGGAC  
CGTGCTCACGTTGCTGAAAAATCGGTTCTGCTGGTGTTCGGTCTTTCTTCACCGACGTTCTGTTGCTGGT  
CCGTCTGGTGAACCGGTTCCGCCGGGTGAAAAAGGTGAAATCGTTGTTTCTGGTCCGAACGTTATGAAAGG  
TACTGGGGTTCGTCGGAAGCTACCGCTGAAGTTCTGCGTGACGGTTGGTTCCGTTCTGGTGACGTTGCTA  
CCGTTGACGGTGACGGTACTTCCACGTTGTTGACCGTCTGAAAGACATGATCATCTCTGGTGGTAAAAACA  
TCTACCCGGCTGAAGTTGAAAACGAACTGTACGGTACCCGGGTGTTGAAGCTTGCCTGTTATCGGTGTT  
CGGACCCGCGTTGGGGTGAAGTTGGTAAAGCTGTTGTTGTTCCGGCTGCTGGTTCTCGTATCGACGGTGCT  
GAACTGCTGGCTTGGCTGCGTACCCGCTGCTGGTGTACAAAGTTCGAAATCTGTTGAATTCACCGACCGT  
CTGCCGACCACCGGTTCTGGTAAAATCCTGAAAGGTGAAGTTCGTCGTCGTTTCGGTTAAGCGGCCGC

### ***ECH***

CATATGTCTACCGCTGTTGGTAACGGTCGTGTTTCGTACCGAACCGTGGGGTGAACCGTTCTGGTTGAATTC  
GACGAAGGTATCGCTTGGGTTACCCTGAACCGTCCGGACAAACGTAACGCTATGAACCCGACCCTGAACGA  
CGAAATGGTTCGTGTTCTGGACCACCTGGAAGGTGACGACCGTTGCCGTGTTCTGGTTCTGACCGGTGCTG  
GTGAATCTTTCTCTGCTGGTATGGACCTGAAAGAATACTTCCGTGAAGTTGACGCTACCGGTTCTACCGCTG  
TTCAGATCAAAGTTCGTGCTGCTTCTGCTGAATGGCAGTGGAACGCTGGCTAACTGGTCTAAACCGACCA  
TCGCTATGGTTAACGGTTGGTGTTCGGTGGTGTTCACCCCGCTGGTTGCTTGTGACCTGGCGTTTCGCT  
GACGAAGACGCTCAGTTCGGTCTGTCTGAAGTTAACTGGGGTATCCCACCGGGTGGCGTTGTAAGCCGTGC  
TCTGGCTGCTACCGTTCGCGAGCGTGACGCTCTGACTACATCATGACCGGTGAACCGTTCGACGGTCGTC  
GTGCTGCTGAAATGCGTCTGGTTAACGAAGCTCTGCCGGCTGACCGTCTGCGTGAACGTACCCGTGAAGTT  
GCTCTGAAACTGGCTTCTATGAACCAGGTTGTTCTGCACGCTGCTAAAACCGGTTACAAAATCGCTCAGGAA  
ATGCCGTGGGAACAGGCTGAAGACTACCTGTACGCTAAACTGGACCAGTCTCAGTTCGCTGACAAAGCTGG  
TGCTCGTGCTAAAGGTCTGACCCAGTTCCTGGACCAGAAATCTTACCGTCCGGGTCTGTCTGCTTTTCGACCC  
GGAAAAATAACTCGAG

### **Note**

All underlined sequence are the restriction sites used for cloning

## Plasmid maps of plasmids used in this study

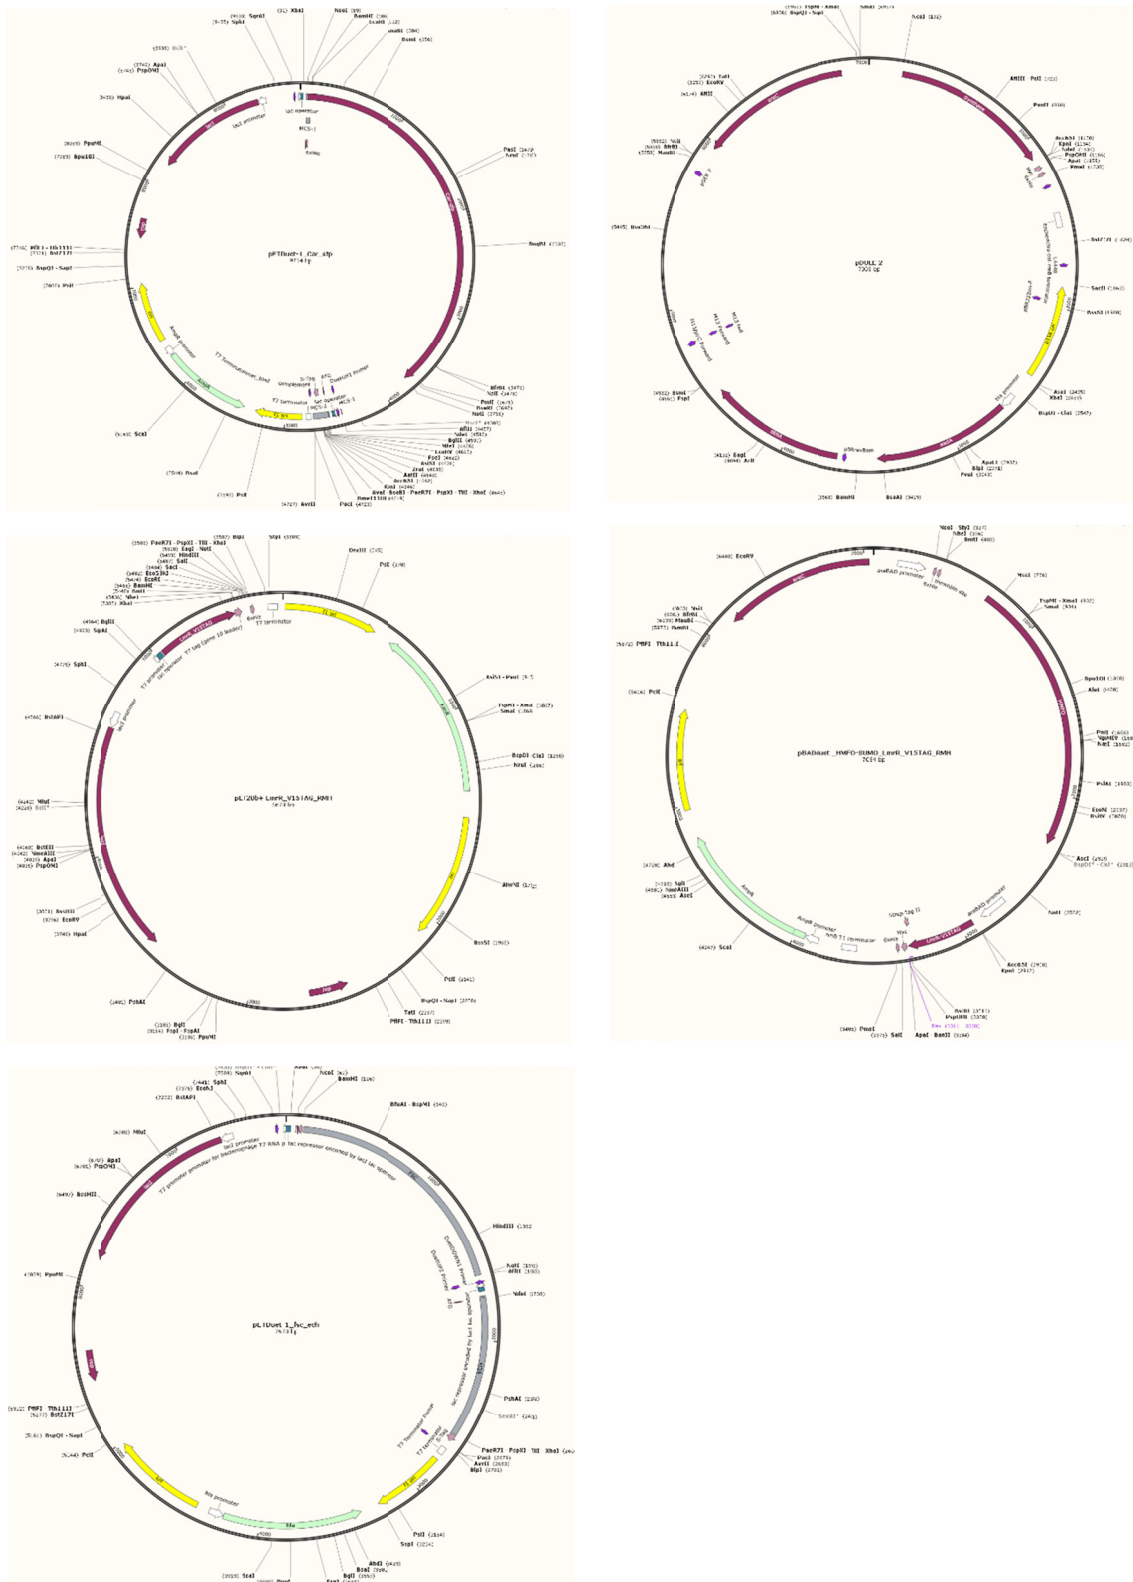

**Figure S24.** All pETDuet-1 vectors were ordered with the synthetic gene from genscript. The empty vector of pET28b+ and pBADduet was received as a gift from Prof Marco Fraaije (University of Groningen).

## Calibration Curves for Aldehydes

### Benzaldehyde (1b) IS: 2-methylanisole

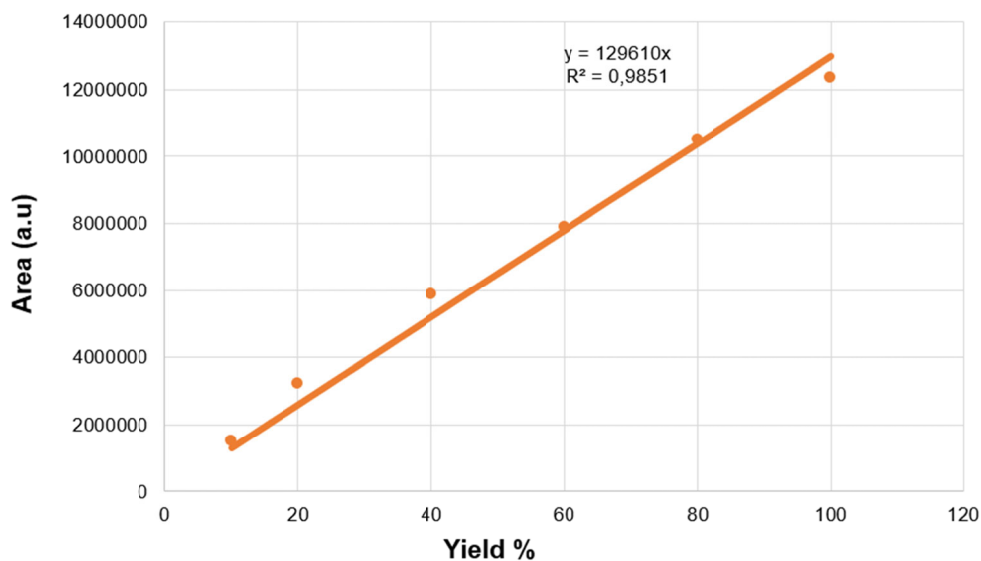

### *p*-OH Benzaldehyde (1a) IS: (2-Phenylquinoline)

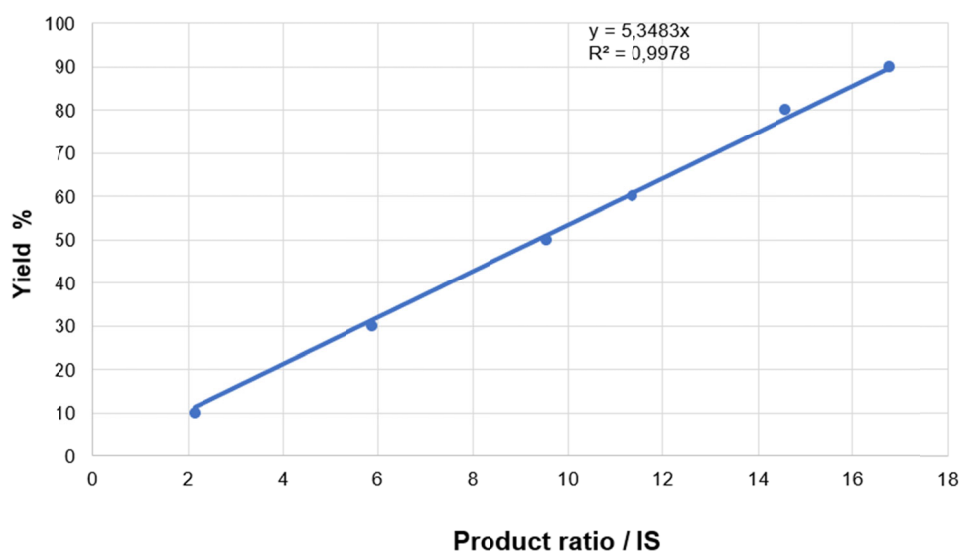

## Chemical synthesis and calibration curves of hydrazone products 3a and 3b

The hydrazone product between NBD-H and 4-hydroxybenzaldehyde (4-HBA) was prepared according to the same procedure as we previously reported <sup>[5]</sup>. The hydrazone product of the reaction between NBD-H and benzaldehyde was prepared



as previously described in the literature<sup>[6]</sup>.<sup>[4]</sup> In brief, NBDH (25 mg, 0.13 mmol, 1 equiv) was dissolved in methanol (10 mL). Benzaldehyde (0.13 mL, 1.3 mmol, 10 equiv) was added, turning the reaction mixture a red color. The product gradually formed as a dark red-black precipitate and was isolated by vacuum filtration. <sup>1</sup>H-NMR (400 MHz, DMSO-d<sub>6</sub>) 12.9 (m, 1H), 8.60 (m, 1H), 7.94–7.90 (m, 2H), 7.84 (m, 1H), 7.63–7.58 (m, 1H), 7.50–7.46 (m, 3H).

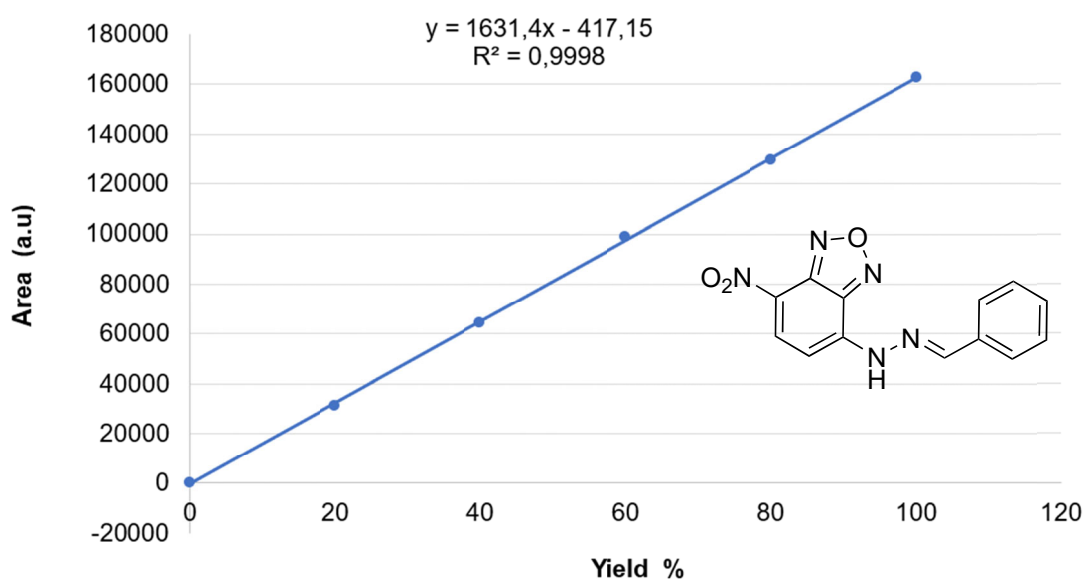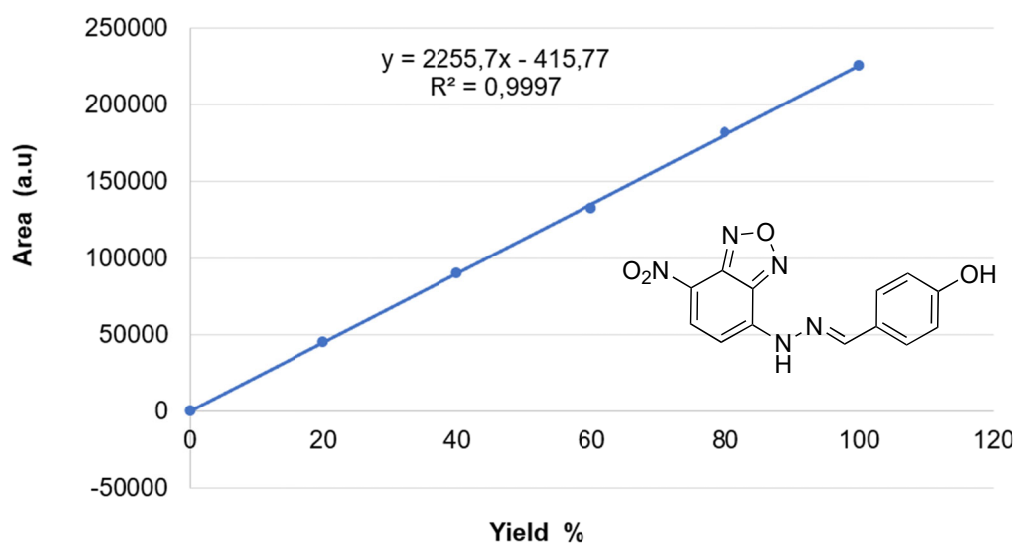

# NMR spectra

1 H-NMR product **3b** in acetone-d6

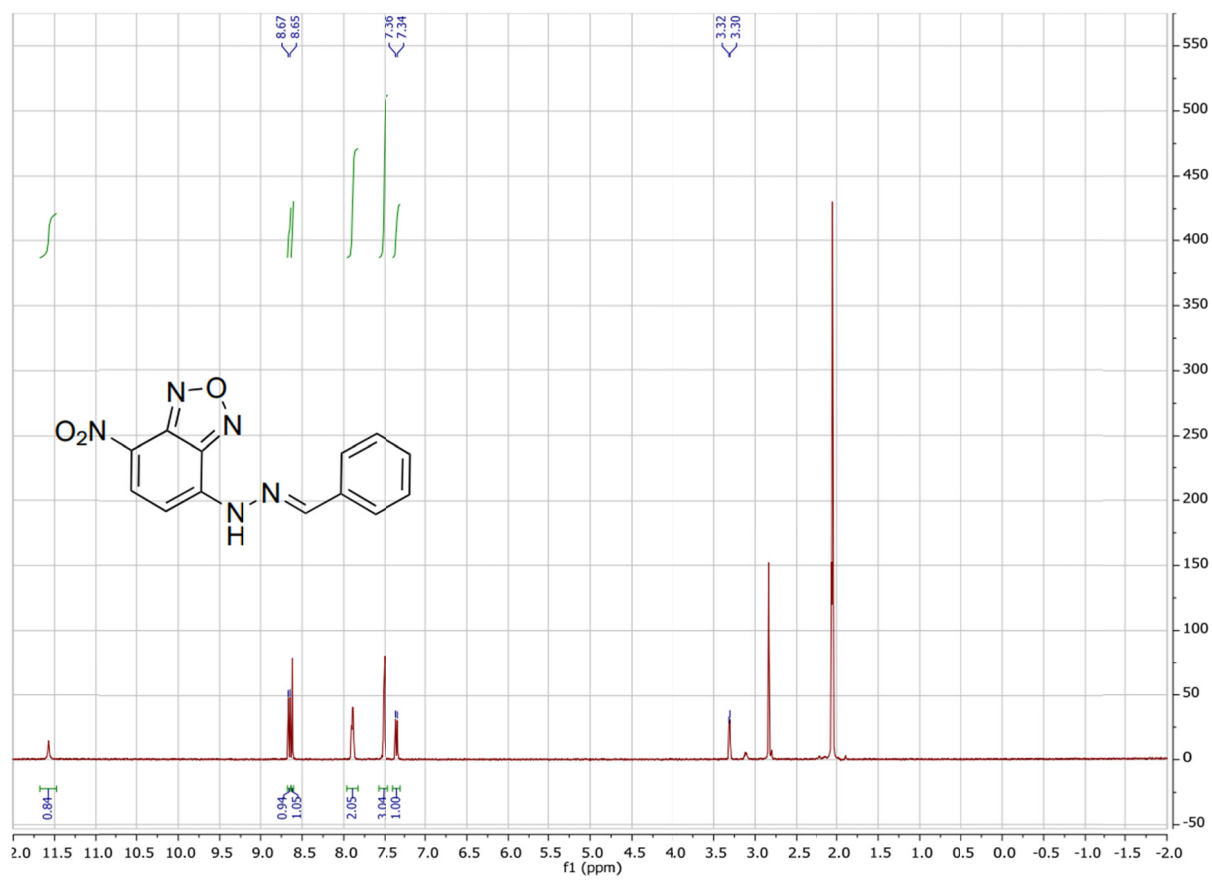

### **Scale up of in vivo hydrazone reaction using LmrR\_V15pAF\_RM/HMFO system.**

Experimental culture cells were grown in 2 L MMV supplemented with antibiotics at 37°C, 135 rpm until OD<sub>600</sub> of 0.6. Gene expression was then induced with 0.02 % arabinose. 1 mM of pAF was also added in a solid form upon expression induction and incubated at 24 °C, agitated at 135 rpm for 48 hrs. Cultures were pelleted and resuspended in phosphate buffer at pH 6.5, to wash away non-incorporated UAA. In the 200 mL cell culture at OD<sub>600</sub> of 25 in buffer, 26 mg of NBDH dissolved in 12 ml acetonitrile (ACN), 5 mM benzyl alcohol (final concentration) in acetonitrile were added and incubated at 24 °C / 135 rpm for overnight. Cells were then collected and spun down at 6000 rpm for 20 mins and collected the supernatant for product extraction. Pellet were then resuspend in 20 ml phosphate buffer and sonicated, the mixture was also spun down and collected the supernatant. The pellet was washed again 3x with 20 ml buffer and ACN (ratio 1:1). Sodium chloride (25 g) was added to the aqueous solution and the reaction mixture was extracted with EtOAc (3 x 300 mL). The remaining aqueous phase was then filtered through celite and extracted again with EtOAc (3 x 300 mL). The combined organic phases were dried with anhydrous Na<sub>2</sub>SO<sub>4</sub> and all volatiles were removed to give the crude product. The product was purified via column chromatography (SiO<sub>2</sub>, Pentane:EtOAc:MeOH=100:5:1). All fractions containing the product were collected giving the hydrazone in a mixture (total mass 8.9 mg).

## NMR spectra 1H-NMR crude product **3b** in acetone-d6

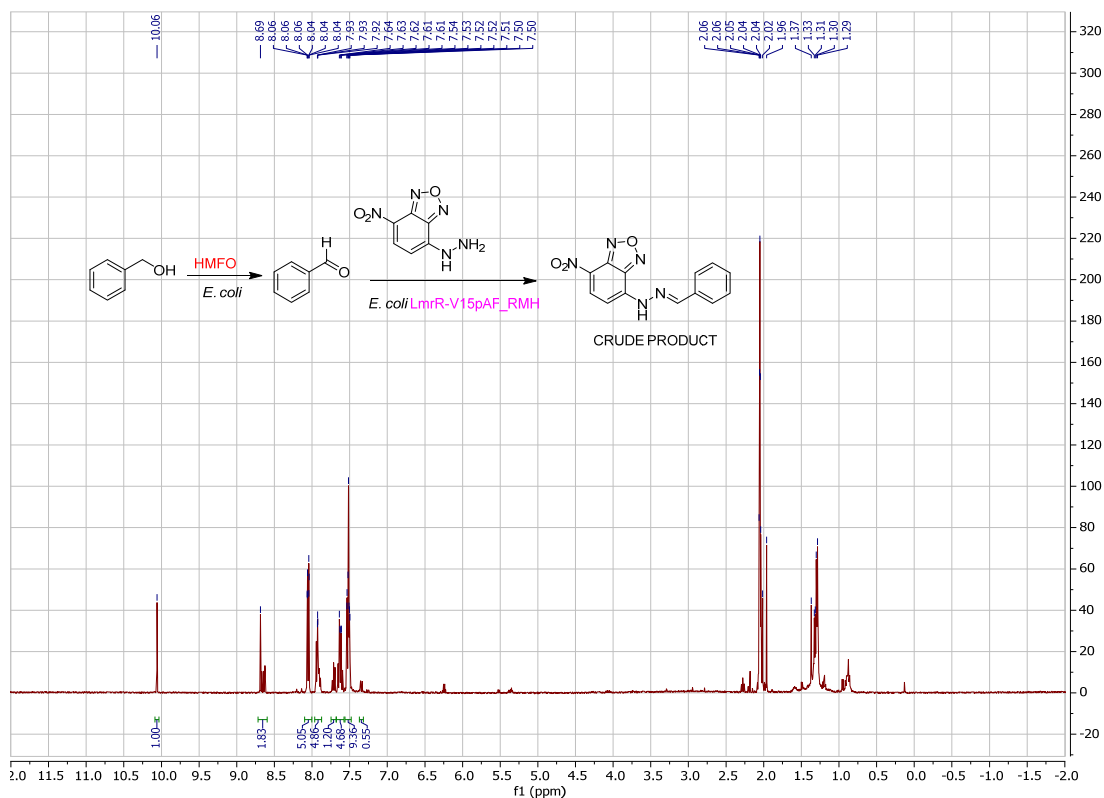

Crude product of **3b** after extraction

## NMR spectra 1H-NMR product **3b** in acetone-d6

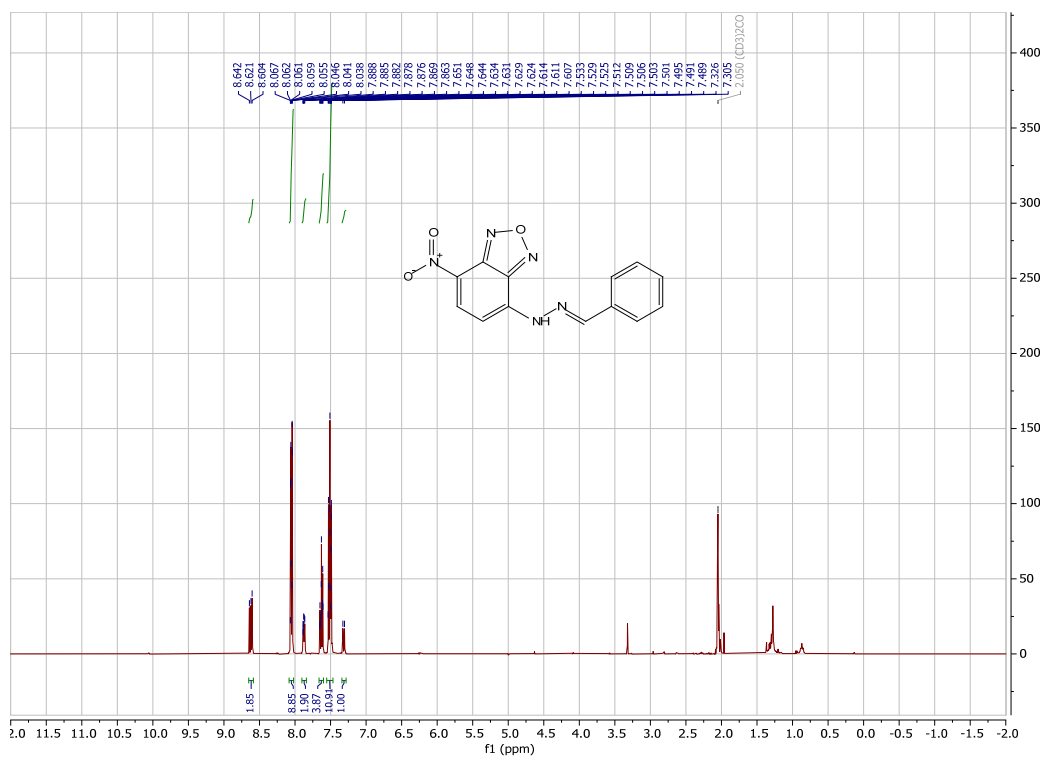

Product **3b** after column purification

The scale up of hydrazone formation using the LmrR\_V15pAF\_RM/HMFO system was successful and the presence of benzaldehyde detected on the NMR shows the efficient oxidation of the benzyl alcohol by the HMFO. The product was extracted and purified by classical organic synthesis technique i.e. column chromatography. However, the yield was lower due to the substrate used (hydrazine), which makes it difficult to extract the product from the cell. As a prove of concept, this substrate was used for the reaction due to the chromogenic nature for easy screening.

### References

- [1] C. Mayer, C. Dulson, E. Reddem, A. M. W. H. Thunnissen, G. Roelfes, *Angew. Chemie - Int. Ed.* **2019**, *58*, 2083–2087.
- [2] R. A. Mehl, J. C. Anderson, S. W. Santoro, L. Wang, A. B. Martin, D. S. King, D. M. Horn, P. G. Schultz, *J. Am. Chem. Soc.* **2003**, *125*, 935–939.
- [3] E. M. Gabor, E. J. De Vries, D. B. Janssen, *Environ. Microbiol.* **2004**, *6*, 948–958.
- [4] J. D.B., *Prog Ind Microbiol* **1984**, *29*, 169–178.
- [5] I. Drienovská, C. Mayer, C. Dulson, G. Roelfes, *Nat. Chem.* **2018**, *10*, 946–952.
- [6] J. A. Key, C. Li, C. W. Cairo, *Bioconjug. Chem.* **2012**, *23*, 363–371.
